# Supplementary material
Source: PubMed Central journal article supplement (PMC5024753)
Supplement: NIHMS69881-supplement-ESI.pdf [file NIHMS69881-supplement-ESI.pdf]

# Electronic Supplementary Information

## Contact Angles and Wettability of Ionic Liquids on Polar and Non-polar Surfaces

Matheus M. Pereira<sup>a,1</sup>, Kiki A. Kurnia<sup>a,b,1</sup>, Filipa L. Sousa<sup>a</sup>, Nuno J. O. Silva<sup>c</sup>, José A. Lopes-da-Silva<sup>d</sup>, João A. P. Coutinho<sup>a</sup> and Mara G. Freire<sup>a\*</sup>

<sup>a</sup>CICECO - Aveiro Institute of Materials, Department of Chemistry, University of Aveiro, 3810-193 Aveiro, Portugal

<sup>b</sup>Center of Research in Ionic Liquids, Department of Chemical Engineering, Universiti Teknologi PETRONAS, Bandar Seri Iskandar 32610 Perak, Malaysia

<sup>c</sup>CICECO - Aveiro Institute of Materials, Departamento de Física, Universidade de Aveiro, 3810-193 Aveiro, Portugal

<sup>d</sup>QOPNA Unit, Department of Chemistry, Universidade de Aveiro, 3810-193 Aveiro, Portugal

<sup>1</sup>Equally contributing authors

\*Corresponding author.

Tel: +351-234-370200; Fax: +351-234-370084; E-mail address: maragfreire@ua.pt.

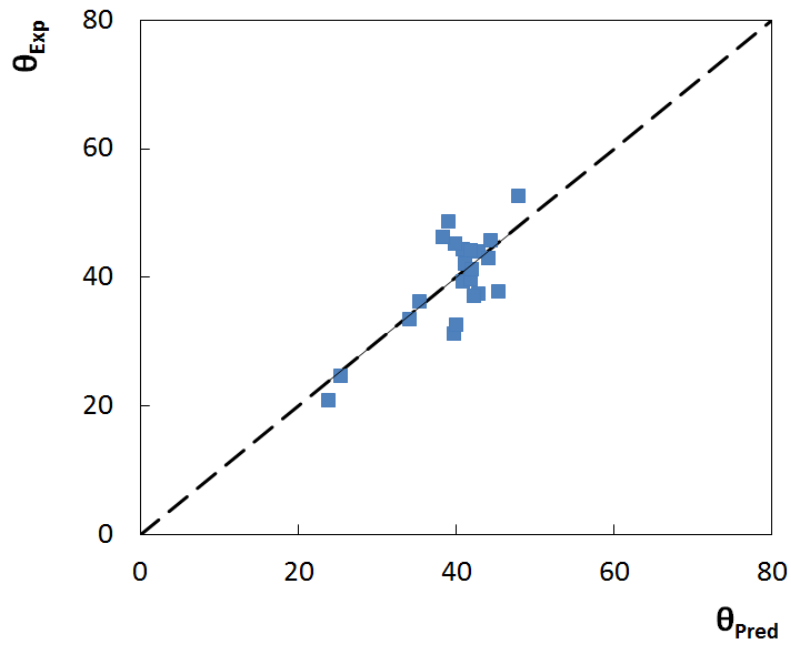

Figure S1. Comparison between experimental,  $\theta_{Exp}$ , and predictive,  $\theta_{Pred}$ , contact angles values using Equation S1.

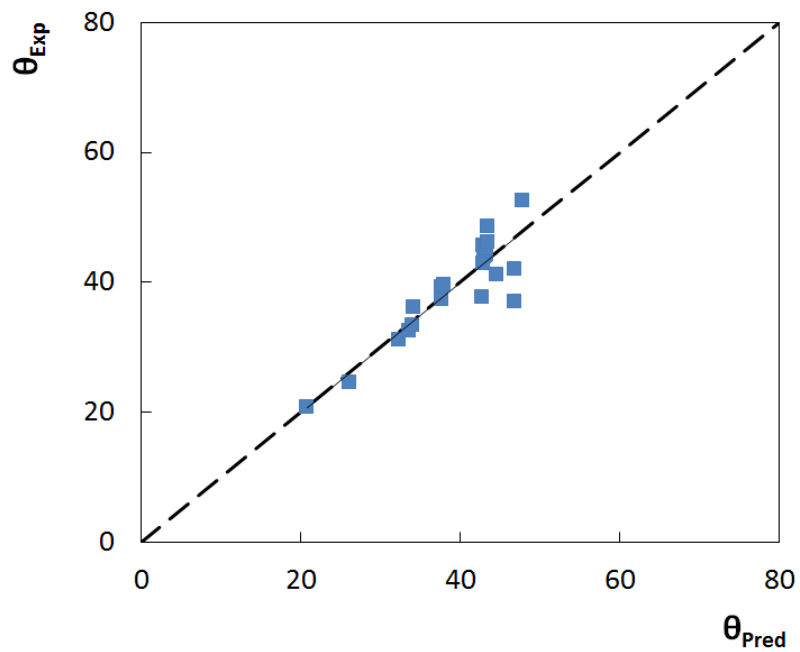

Figure S2. Comparison between experimental,  $\theta_{Exp}$ , and predictive,  $\theta_{Pred}$ , contact angles values using Equation 3.

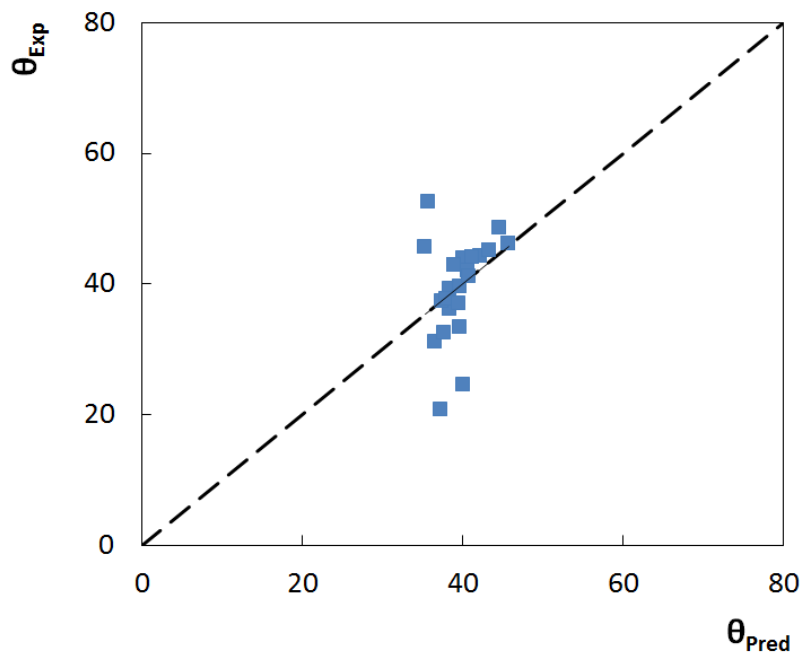

Figure S3. Comparison between experimental,  $\theta_{Exp}$ , and predictive,  $\theta_{Pred}$ , contact angles values using Equation S2.

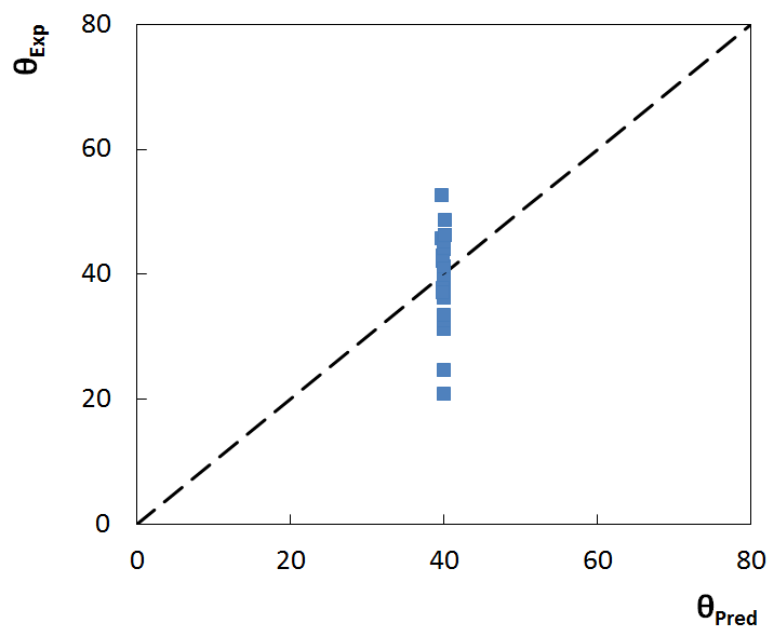

Figure S4. Comparison between experimental,  $\theta_{Exp}$ , and predictive,  $\theta_{Pred}$ , contact angles values using Equation S3.

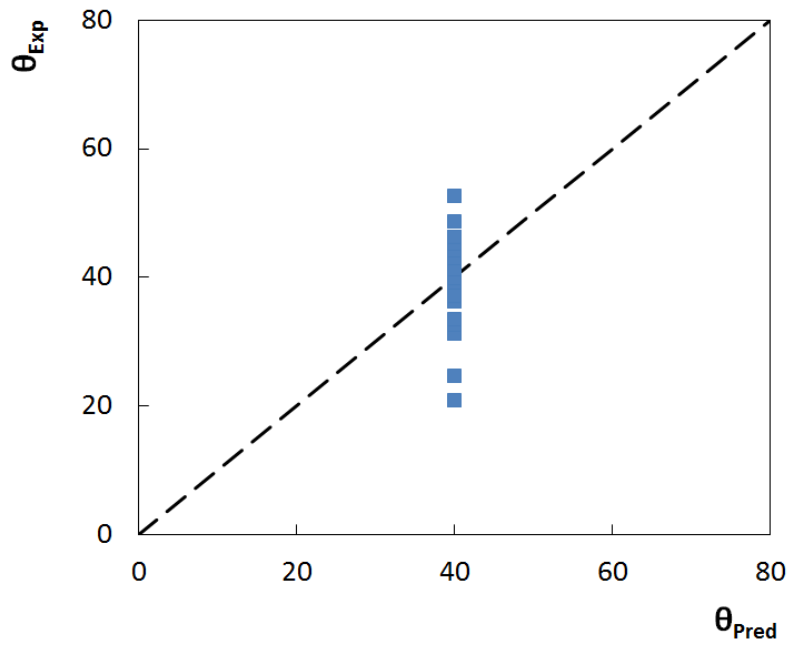

Figure S5. Comparison between experimental,  $\theta_{Exp}$ , and predictive,  $\theta_{Pred}$ , contact angles values using Equation S4.

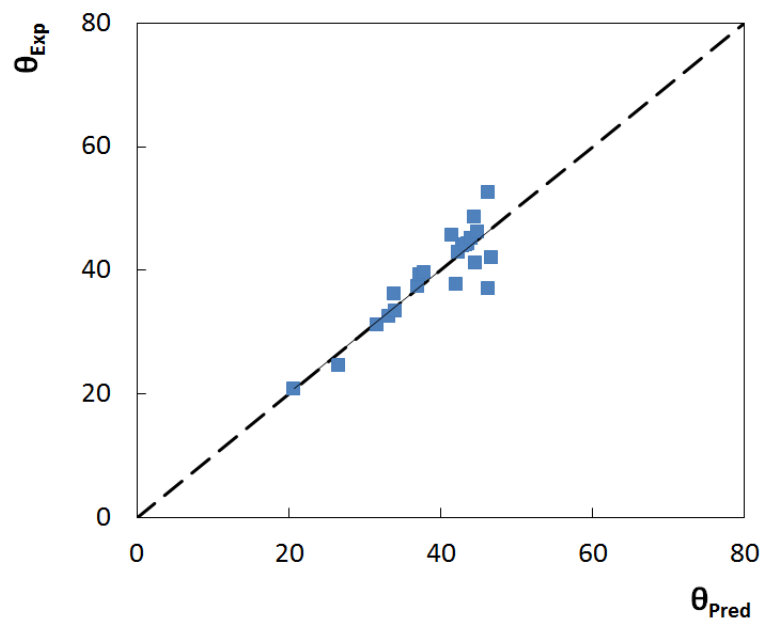

Figure S6. Comparison between experimental,  $\theta_{Exp}$ , and predictive,  $\theta_{Pred}$ , contact angles values using Equation S5.

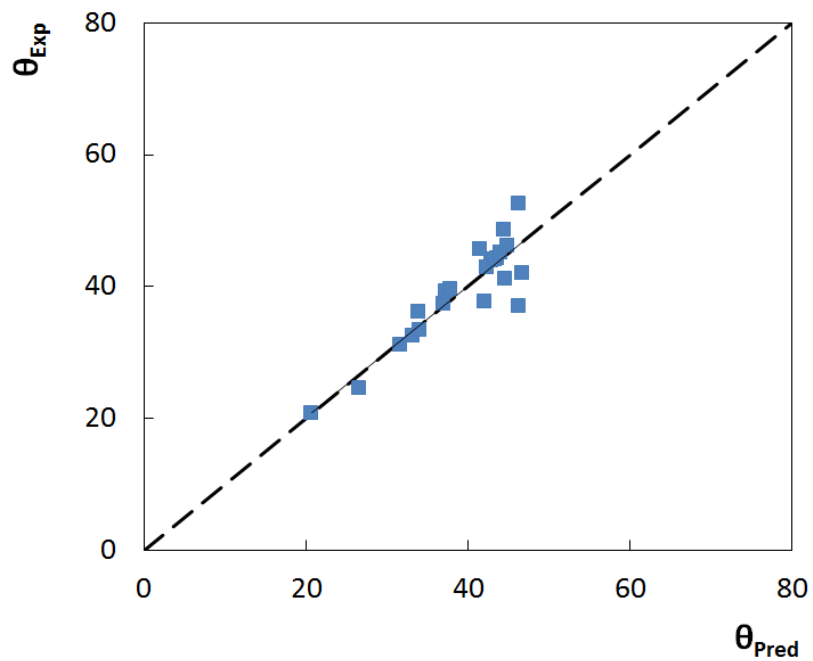

Figure S7. Comparison between experimental,  $\theta_{\text{Exp}}$ , and predictive,  $\theta_{\text{Pred}}$ , contact angles values using Equation S6.

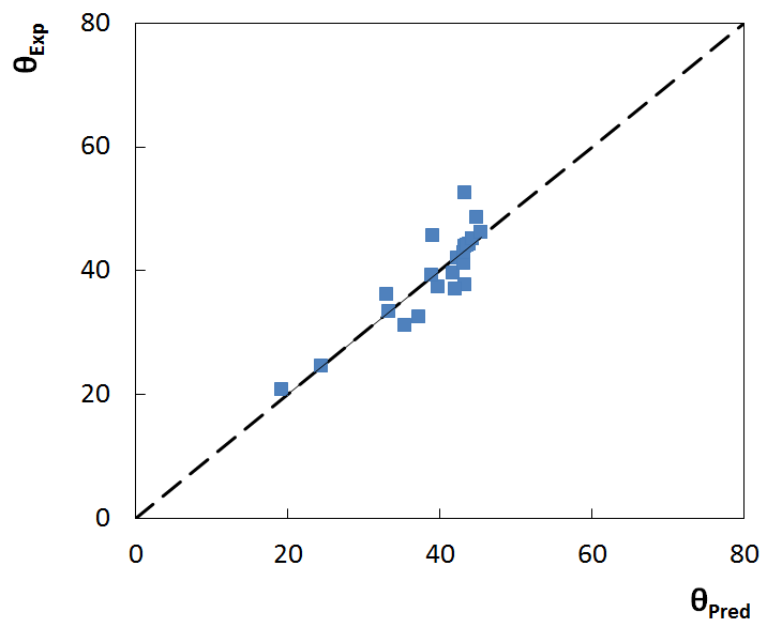

Figure S8. Comparison between experimental,  $\theta_{\text{Exp}}$ , and predictive,  $\theta_{\text{Pred}}$ , contact angles values using Equation S7.

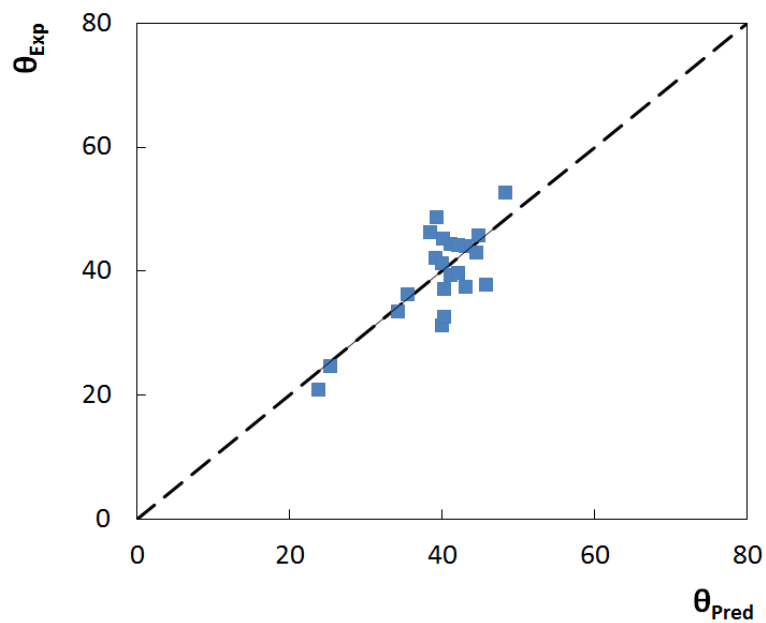

Figure S9. Comparison between experimental,  $\theta_{Exp}$ , and predictive,  $\theta_{Pred}$ , contact angles values using Equation S8.

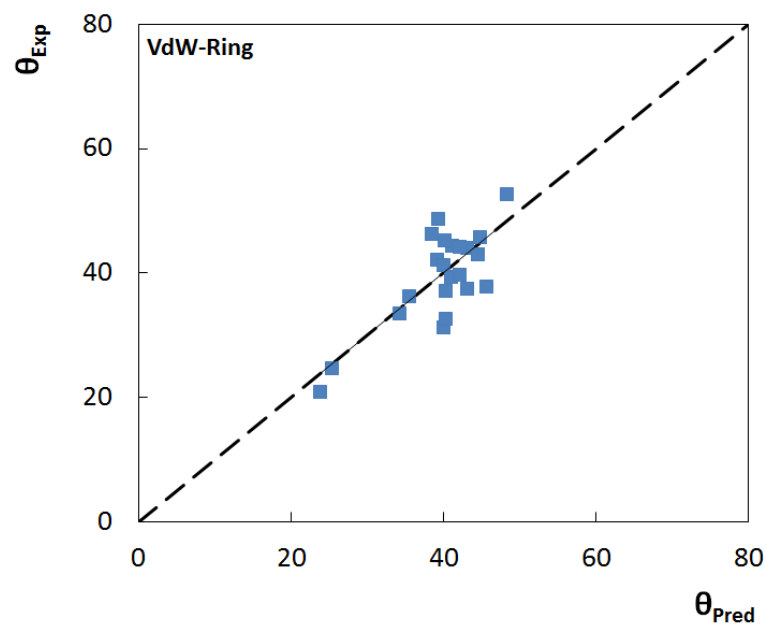

Figure S10. Comparison between experimental,  $\theta_{Exp}$ , and predictive,  $\theta_{Pred}$ , contact angles values using Equation S9.

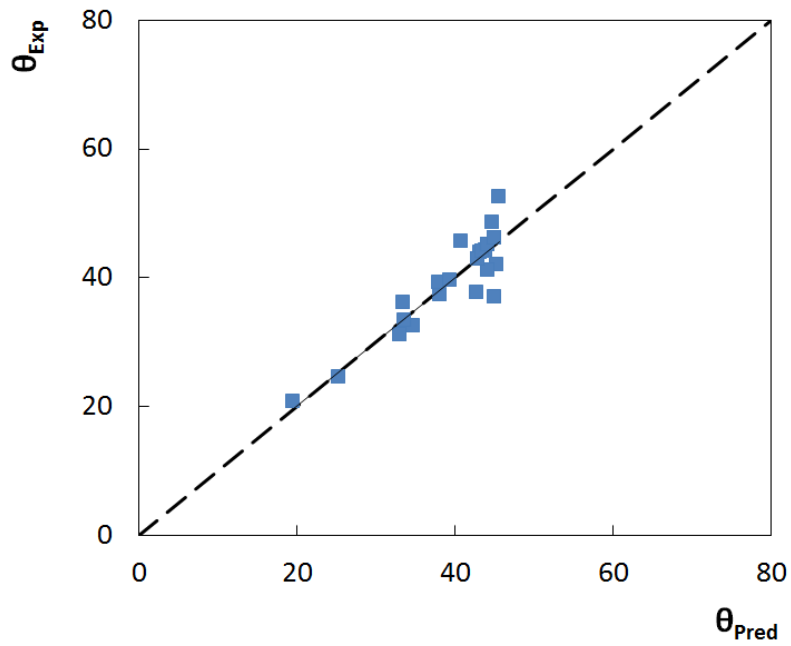

Figure S11. Comparison between experimental,  $\theta_{Exp}$ , and predictive,  $\theta_{Pred}$ , contact angles values using Equation S10.

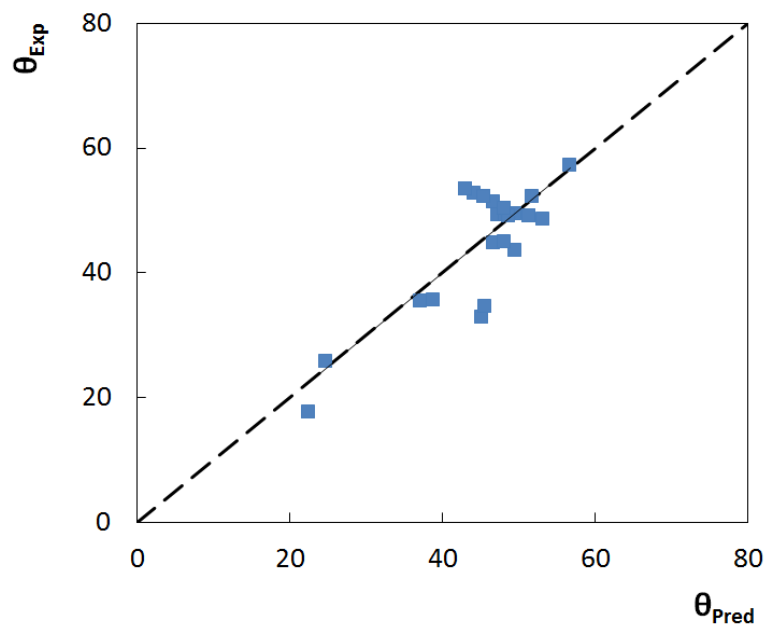

Figure S12. Comparison between experimental,  $\theta_{Exp}$ , and predictive,  $\theta_{Pred}$ , contact angles values using Equation S11.

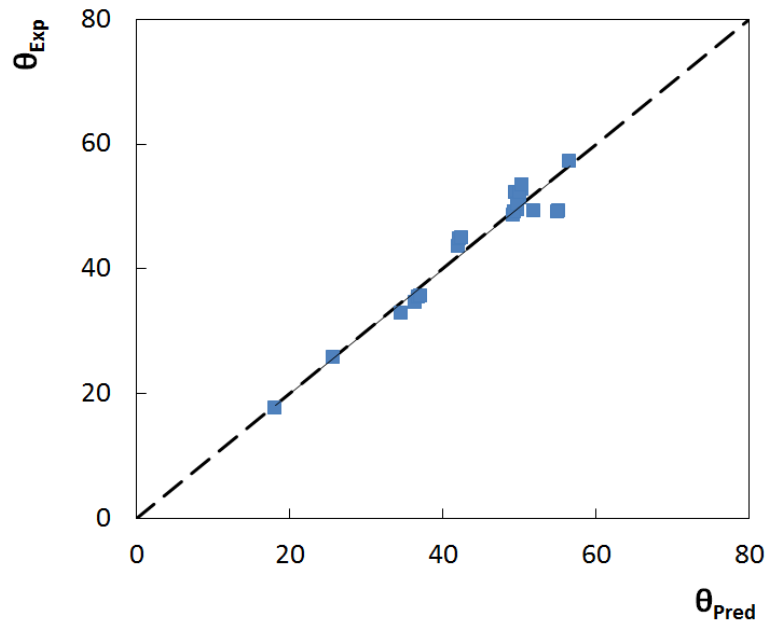

Figure S13. Comparison between experimental,  $\theta_{Exp}$ , and predictive,  $\theta_{Pred}$ , contact angles values using Equation 5.

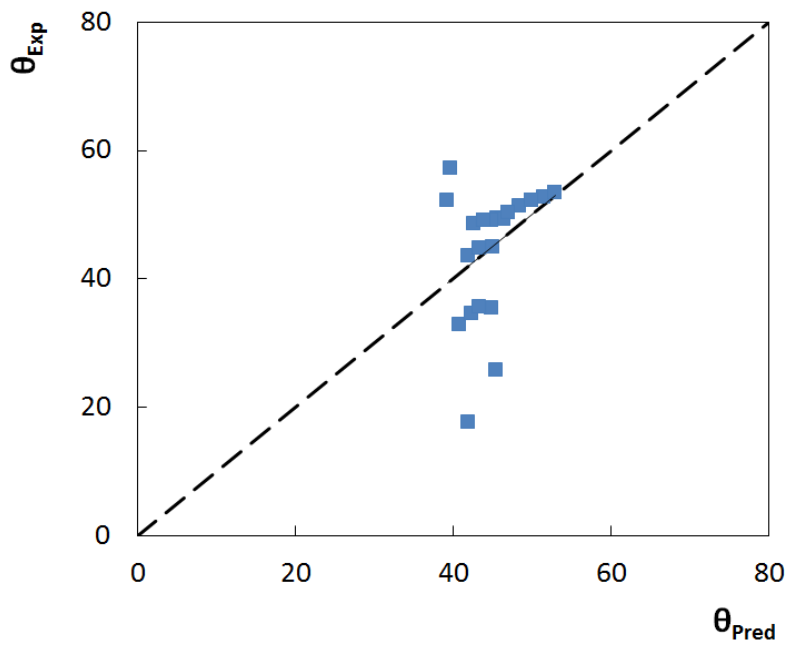

Figure S14. Comparison between experimental,  $\theta_{Exp}$ , and predictive,  $\theta_{Pred}$ , contact angles values using Equation S12.



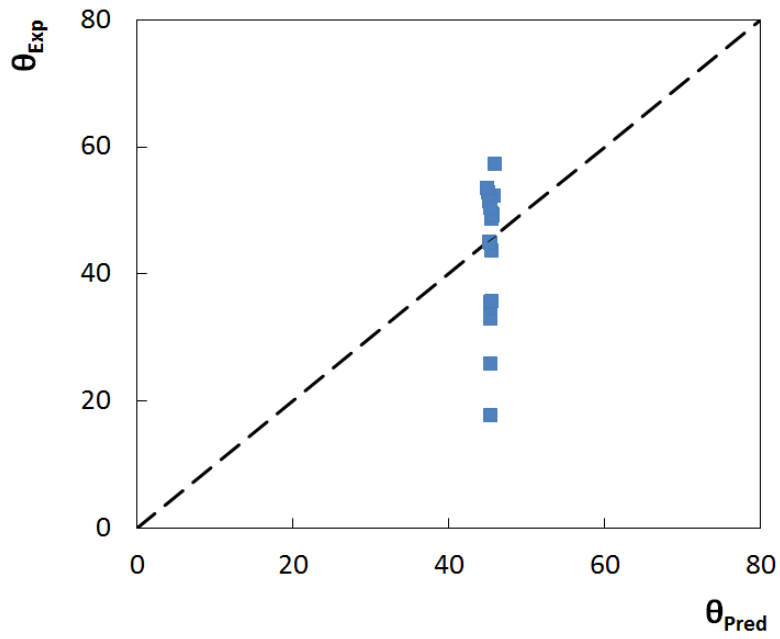

Figure S15. Comparison between experimental,  $\theta_{Exp}$ , and predictive,  $\theta_{Pred}$ , contact angles values using Equation S13.

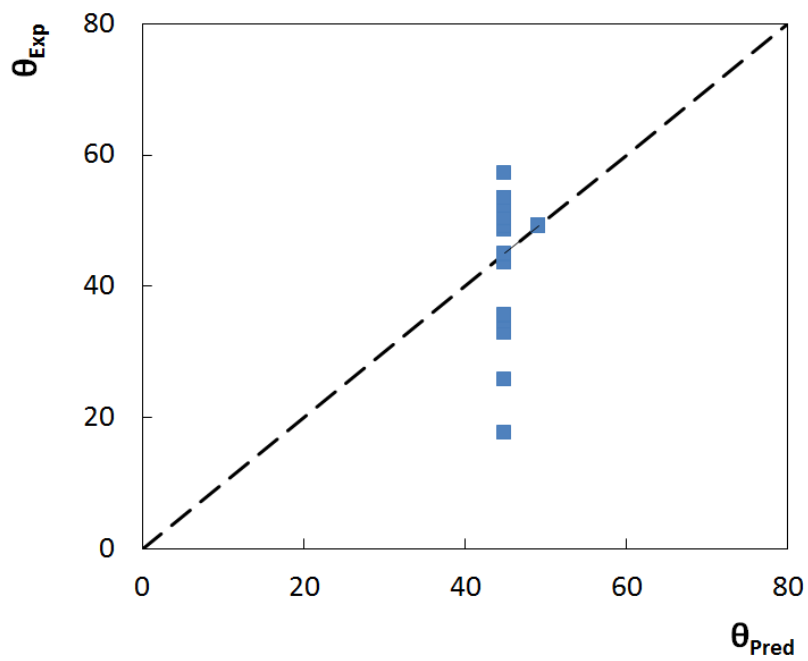

Figure S16. Comparison between experimental,  $\theta_{Exp}$ , and predictive,  $\theta_{Pred}$ , contact angles values using Equation S14.

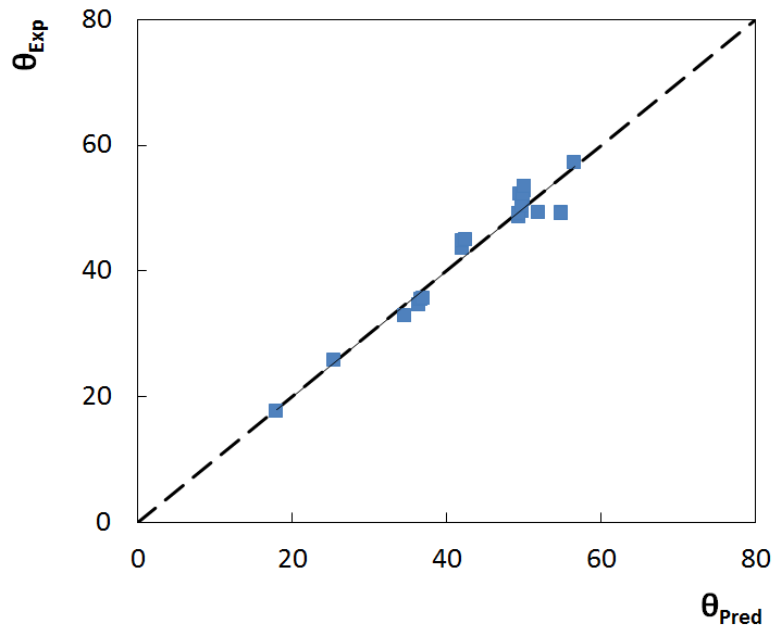

Figure S17. Comparison between experimental,  $\theta_{Exp}$ , and predictive,  $\theta_{Pred}$ , contact angles values using Equation S15.

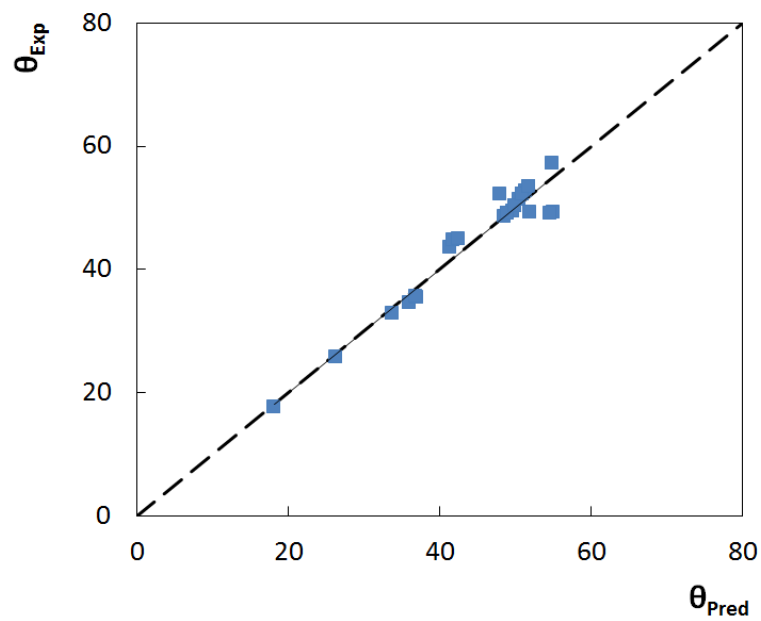

Figure S18. Comparison between experimental,  $\theta_{Exp}$ , and predictive,  $\theta_{Pred}$ , contact angles values using Equation S16.

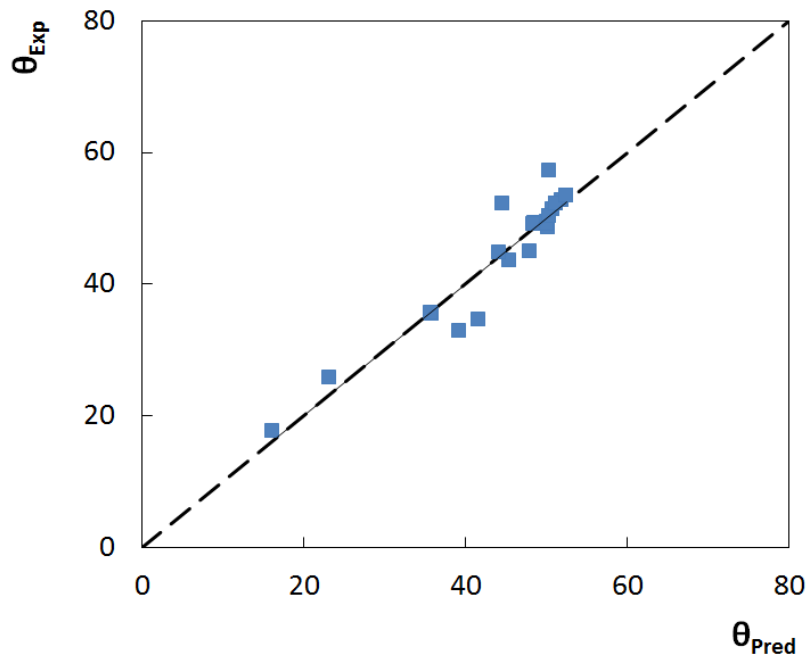

Figure S19. Comparison between experimental,  $\theta_{Exp}$ , and predictive,  $\theta_{Pred}$ , contact angles values using Equation S17.

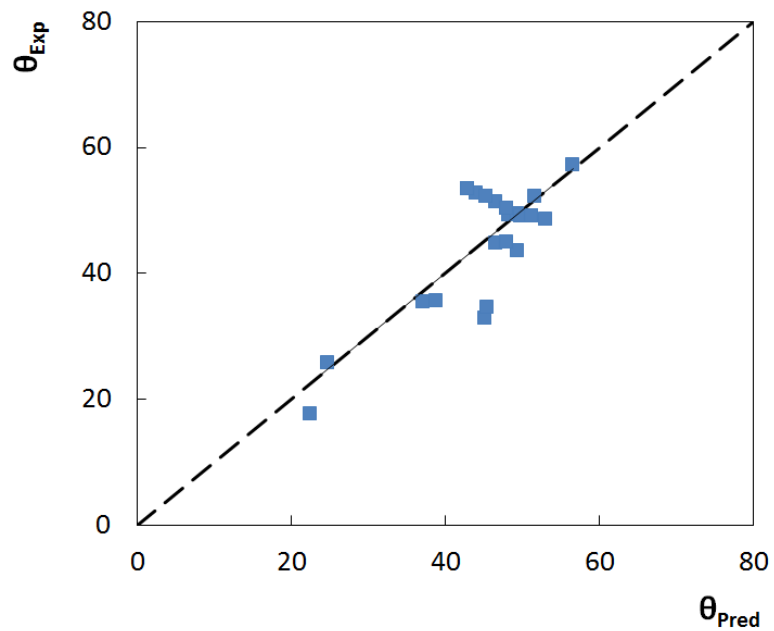

Figure S20. Comparison between experimental,  $\theta_{Exp}$ , and predictive,  $\theta_{Pred}$ , contact angles values using Equation S18.

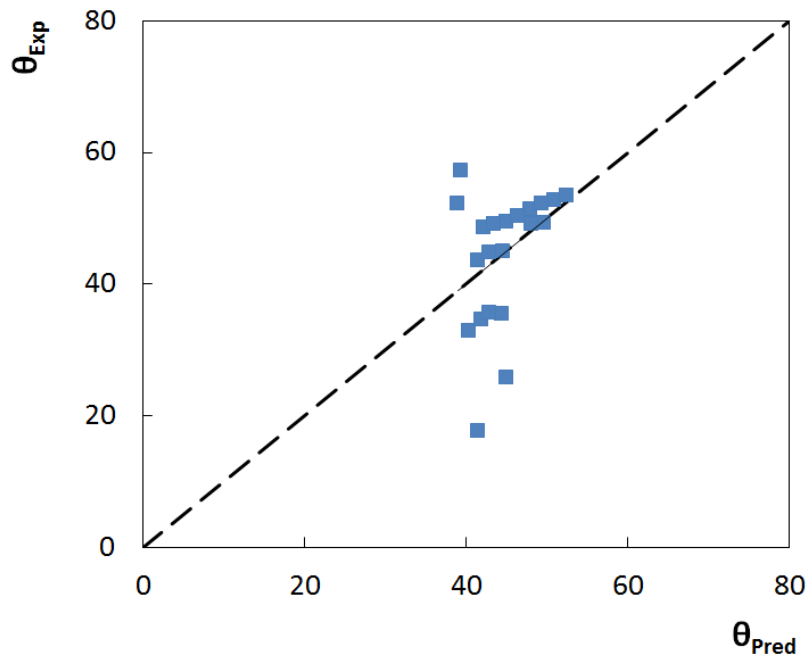

Figure S21. Comparison between experimental,  $\theta_{\text{Exp}}$ , and predictive,  $\theta_{\text{Pred}}$ , contact angles values using Equation S19.

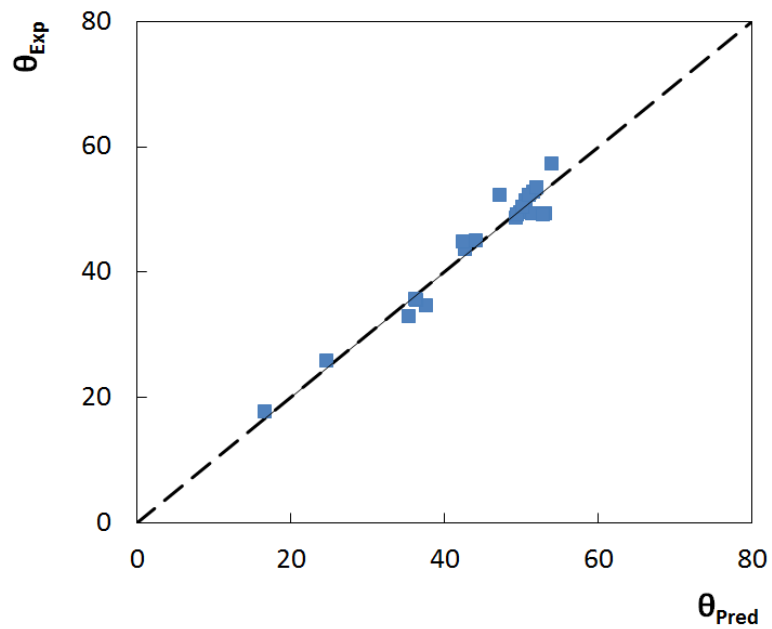

Figure S22. Comparison between experimental,  $\theta_{\text{Exp}}$ , and predictive,  $\theta_{\text{Pred}}$ , contact angles values using Equation S20.

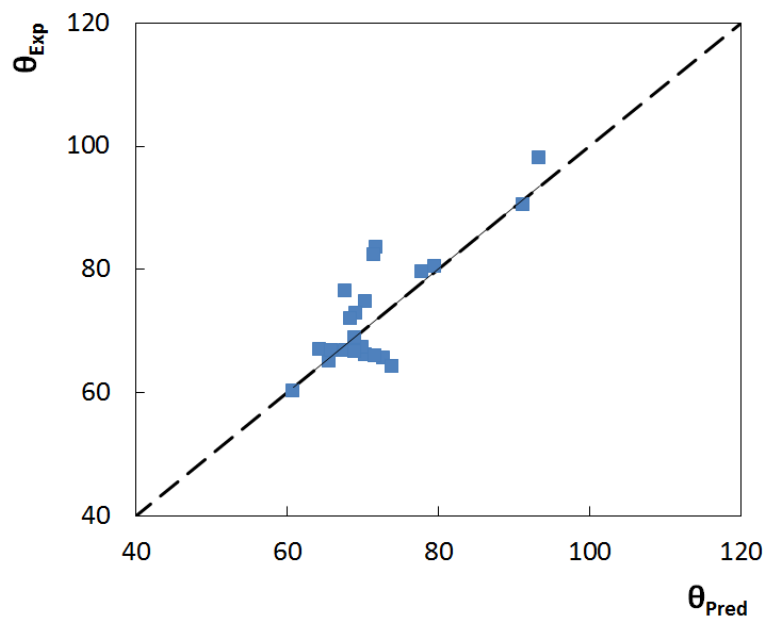

Figure S23. Comparison between experimental,  $\theta_{Exp}$ , and predictive,  $\theta_{Pred}$ , contact angles values using Equation S21.

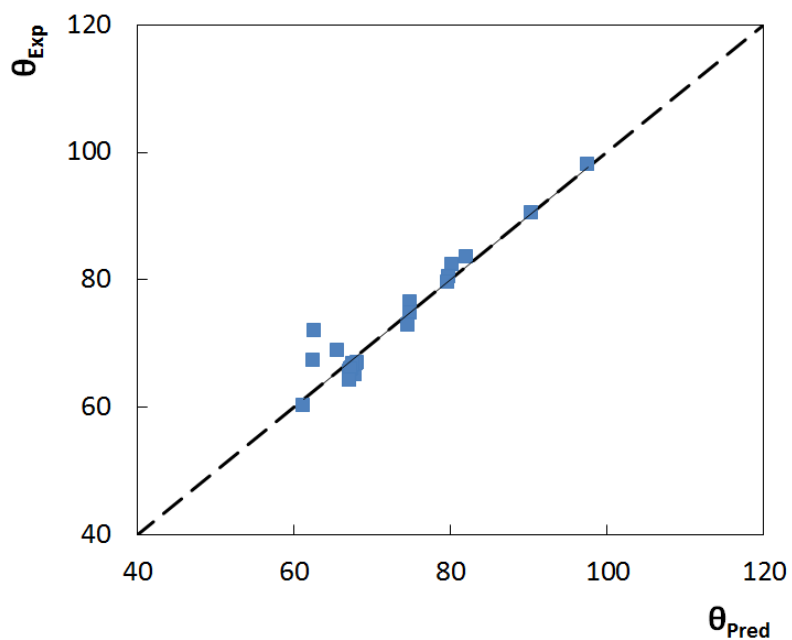

Figure S24. Comparison between experimental,  $\theta_{Exp}$ , and predictive,  $\theta_{Pred}$ , contact angles values using Equation 7.

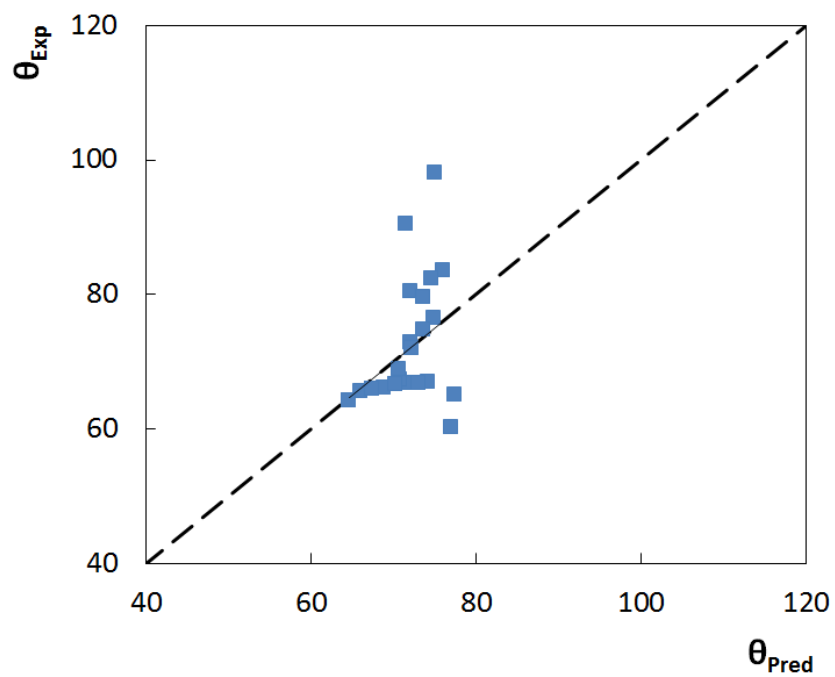

Figure S25. Comparison between experimental,  $\theta_{Exp}$ , and predictive,  $\theta_{Pred}$ , contact angles values using Equation S22.

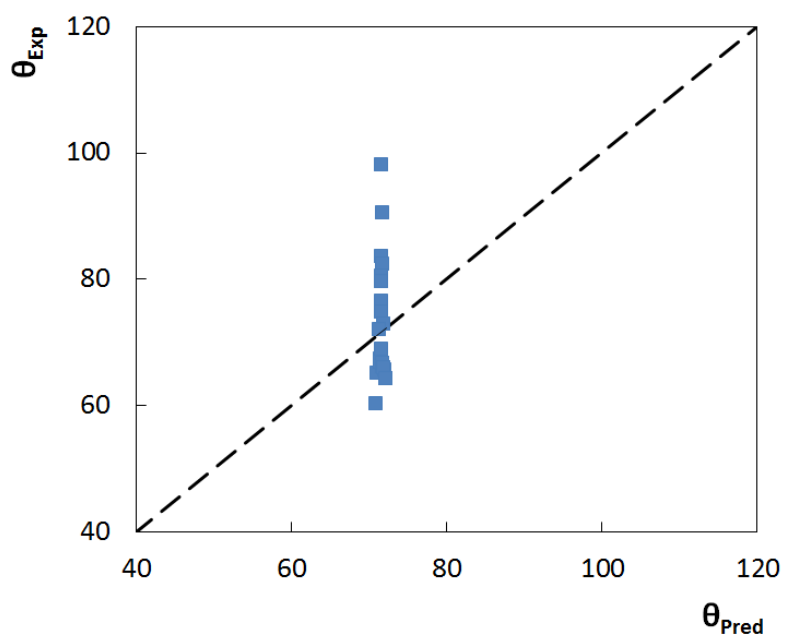

Figure S26. Comparison between experimental,  $\theta_{Exp}$ , and predictive,  $\theta_{Pred}$ , contact angles values using Equation S23.

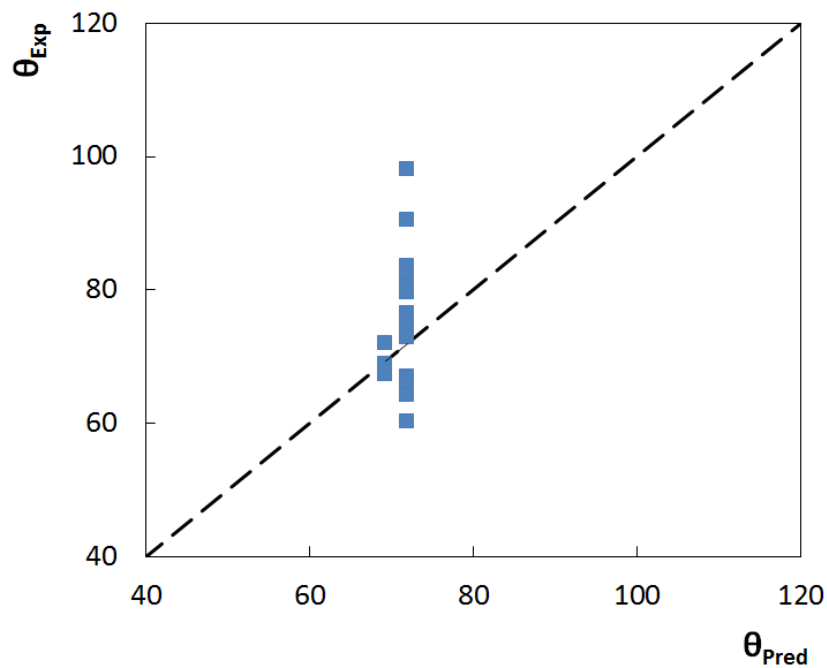

Figure S27. Comparison between experimental,  $\theta_{Exp}$ , and predictive,  $\theta_{Pred}$ , contact angles values using Equation S24.

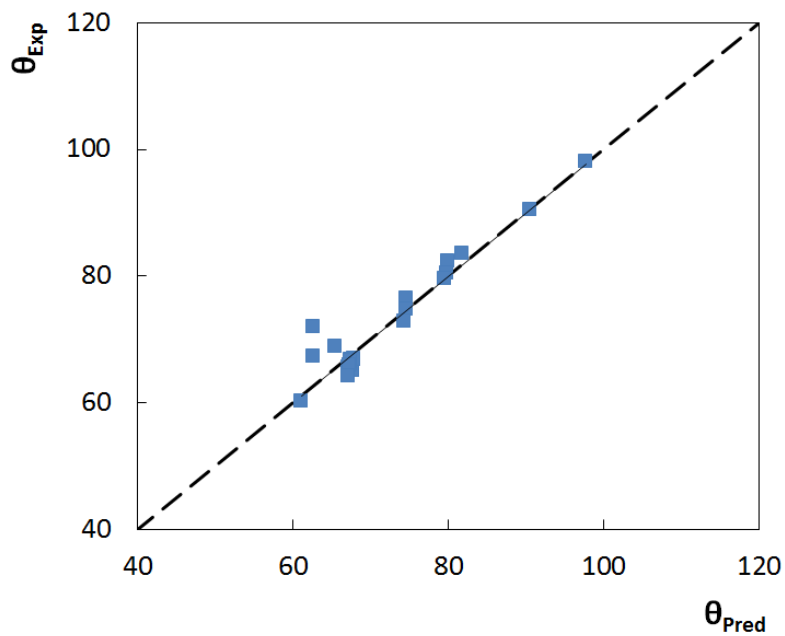

Figure S28. Comparison between experimental,  $\theta_{Exp}$ , and predictive,  $\theta_{Pred}$ , contact angles values using Equation S25.

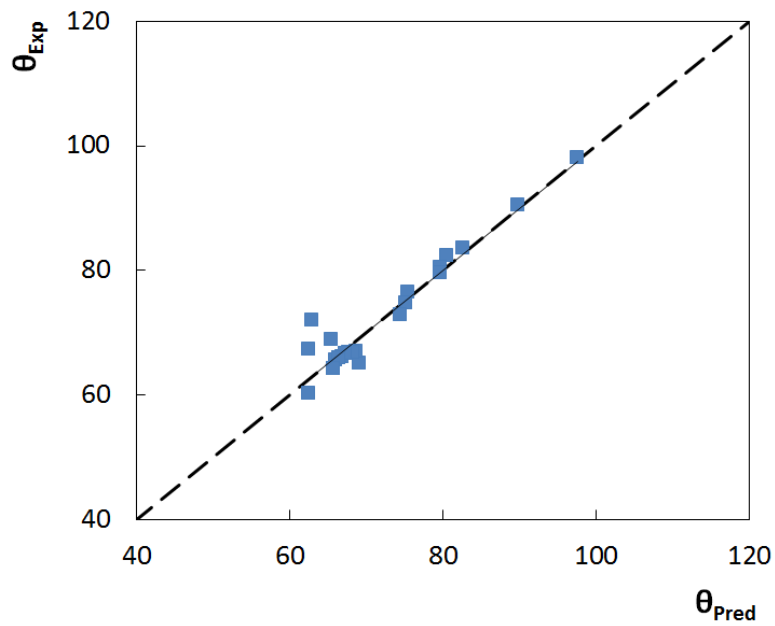

Figure S29. Comparison between experimental,  $\theta_{Exp}$ , and predictive,  $\theta_{Pred}$ , contact angles values using Equation S26.

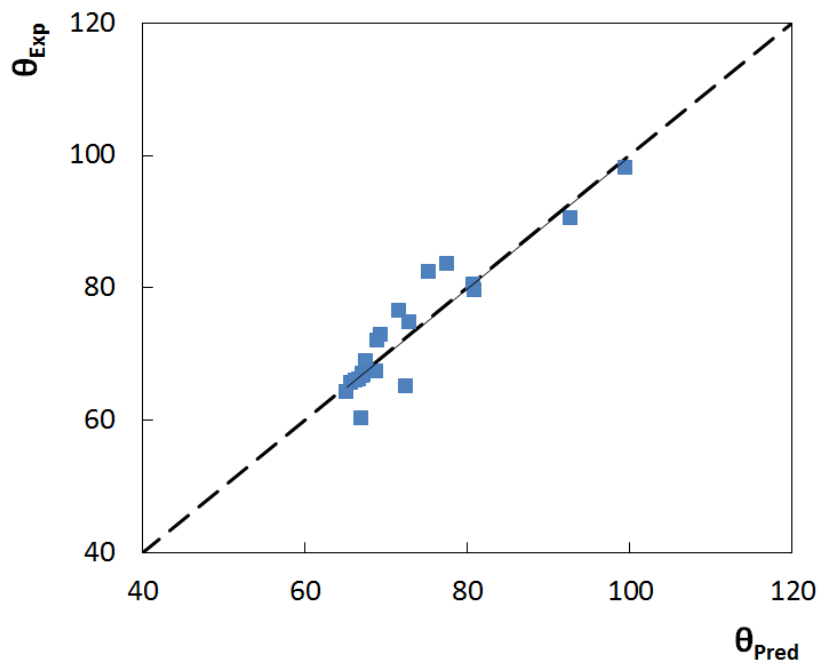

Figure S30. Comparison between experimental,  $\theta_{Exp}$ , and predictive,  $\theta_{Pred}$ , contact angles values using Equation S27.



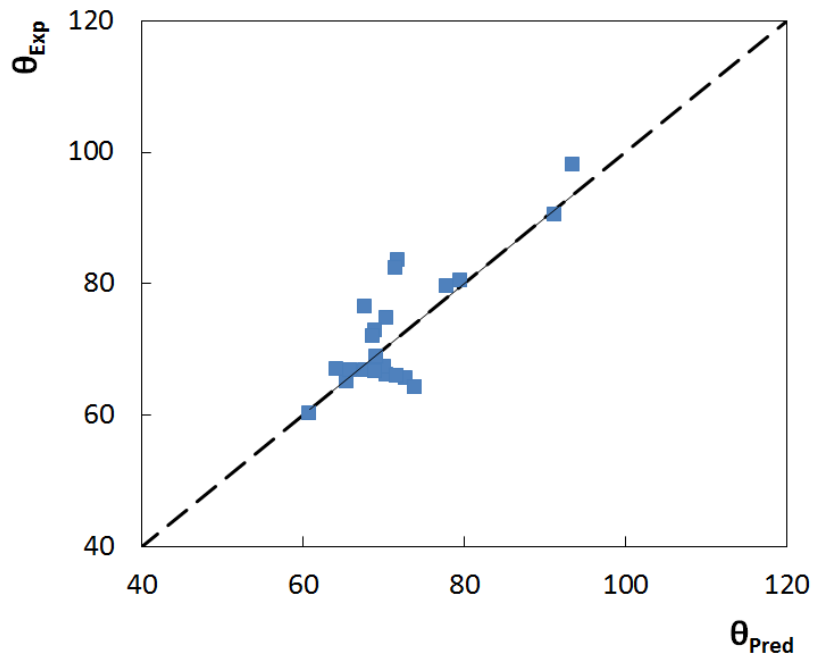

Figure S31. Comparison between experimental,  $\theta_{Exp}$ , and predictive,  $\theta_{Pred}$ , contact angles values using Equation S28.

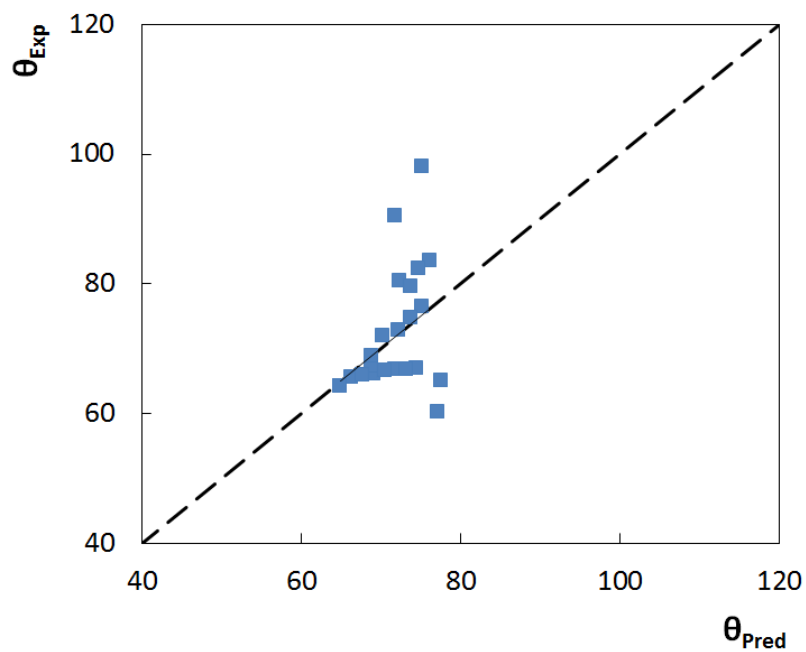

Figure S32. Comparison between experimental,  $\theta_{Exp}$ , and predictive,  $\theta_{Pred}$ , contact angles values using Equation S29.

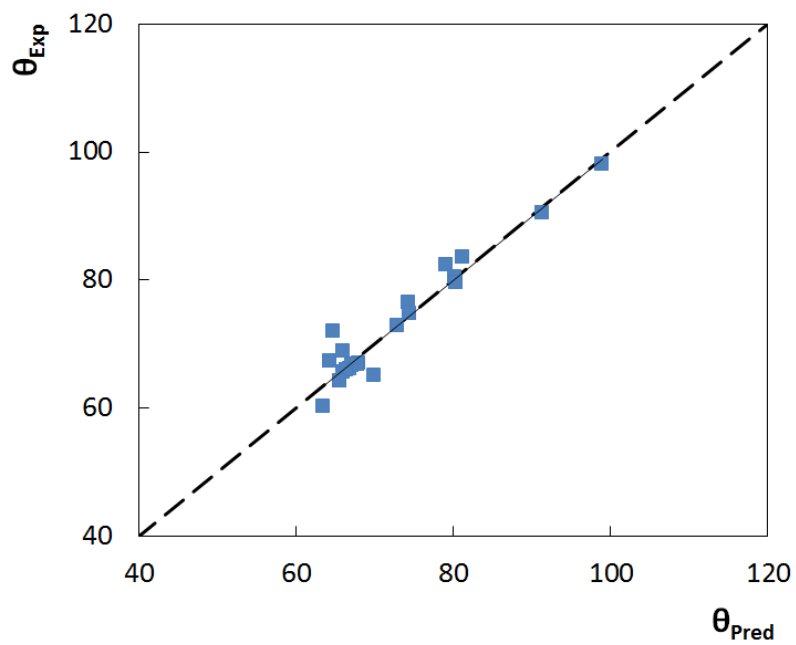

Figure S33. Comparison between experimental,  $\theta_{\text{Exp}}$ , and predictive,  $\theta_{\text{Pred}}$ , contact angles values using Equation S30.

Table S1. IL cation-anion interaction energies predicted using COSMO-RS.

| Ionic Liquids                                                        | kJ·mol <sup>-1</sup> |                 |                 |                  |                   |
|----------------------------------------------------------------------|----------------------|-----------------|-----------------|------------------|-------------------|
|                                                                      | $E_{\text{INT}}$     | $E_{\text{MF}}$ | $E_{\text{HB}}$ | $E_{\text{vdW}}$ | $E_{\text{Ring}}$ |
| [C <sub>4</sub> C <sub>1</sub> im][Ac]                               | -39.391              | 55.317          | -39.721         | -55.532          | -3.912            |
| [C <sub>4</sub> C <sub>1</sub> im][DMP]                              | -41.260              | 53.515          | -32.355         | -65.029          | -3.912            |
| [C <sub>4</sub> C <sub>1</sub> im][TFA]                              | -38.476              | 37.244          | -23.927         | -52.666          | -3.912            |
| [C <sub>4</sub> C <sub>1</sub> im][N(CN) <sub>2</sub> ]              | -40.886              | 36.989          | -22.122         | -56.721          | -3.912            |
| [C <sub>4</sub> C <sub>1</sub> im][EtSO <sub>4</sub> ]               | -40.066              | 43.661          | -21.670         | -63.529          | -3.912            |
| [C <sub>4</sub> C <sub>1</sub> im][MeSO <sub>4</sub> ]               | -37.650              | 42.266          | -21.450         | -59.330          | -3.912            |
| [C <sub>4</sub> C <sub>1</sub> im][CF <sub>3</sub> SO <sub>3</sub> ] | -37.509              | 33.815          | -16.711         | -55.648          | -3.912            |
| [C <sub>4</sub> C <sub>1</sub> im][SCN]                              | -38.888              | 36.096          | -16.640         | -59.356          | -3.912            |
| [C <sub>4</sub> C <sub>1</sub> im][C(CN) <sub>3</sub> ]              | -44.027              | 34.931          | -16.300         | -63.796          | -3.912            |
| [C <sub>4</sub> C <sub>1</sub> im][NTf <sub>2</sub> ]                | -37.985              | 33.774          | -9.279          | -65.077          | -3.912            |
| [C <sub>4</sub> C <sub>1</sub> im][BF <sub>4</sub> ]                 | -25.169              | 31.988          | -9.543          | -48.748          | -3.912            |
| [C <sub>4</sub> C <sub>1</sub> im][PF <sub>6</sub> ]                 | -23.218              | 28.069          | -2.791          | -49.884          | -3.912            |
| [C <sub>2</sub> C <sub>1</sub> im][NTf <sub>2</sub> ]                | -34.083              | 30.924          | -9.771          | -57.538          | -3.912            |
| [C <sub>3</sub> C <sub>1</sub> im][NTf <sub>2</sub> ]                | -36.090              | 32.325          | -9.642          | -60.988          | -3.912            |
| [C <sub>5</sub> C <sub>1</sub> im][NTf <sub>2</sub> ]                | -40.561              | 34.913          | -9.224          | -68.777          | -3.912            |
| [C <sub>6</sub> C <sub>1</sub> im][NTf <sub>2</sub> ]                | -43.162              | 36.017          | -9.068          | -72.649          | -3.912            |
| [C <sub>7</sub> C <sub>1</sub> im][NTf <sub>2</sub> ]                | -45.936              | 37.056          | -8.958          | -76.543          | -3.912            |
| [C <sub>8</sub> C <sub>1</sub> im][NTf <sub>2</sub> ]                | -49.070              | 38.084          | -8.768          | -80.597          | -3.912            |
| [C <sub>9</sub> C <sub>1</sub> im][NTf <sub>2</sub> ]                | -51.630              | 38.954          | -8.725          | -84.397          | -3.912            |
| [C <sub>3</sub> C <sub>1</sub> pip][NTf <sub>2</sub> ]               | -31.199              | 34.438          | -4.270          | -63.310          | -4.694            |
| [C <sub>4</sub> C <sub>1</sub> pip][NTf <sub>2</sub> ]               | -33.697              | 35.662          | -4.132          | -67.218          | -4.694            |
| [C <sub>4</sub> -4-C <sub>1</sub> py][NTf <sub>2</sub> ]             | -37.666              | 34.808          | -7.176          | -67.404          | -4.694            |

Table S2. Correlation between experimental contact angles of ILs on the polar glass surface,  $\theta_g$ , with cation-anion interaction energies estimated using COSMO-RS along with the correlation coefficient,  $R^2$ , Fisher significance parameter,  $F$ , and average absolute relative deviation, AARD.

|                                                                                                                                                        | $R^2$   | $F$     | ARD/% | Equation |
|--------------------------------------------------------------------------------------------------------------------------------------------------------|---------|---------|-------|----------|
| $\theta_g = ((-0.8837 \pm 0.1623) \times E_{MF}) + (72.8658 \pm 6.0964)$                                                                               | 0.5339  | 29.6372 | 9.50  | (S1)     |
| $\theta_g = ((-0.2887 \pm 0.1382) \times E_{vdW}) + (21.3776 \pm 9.0570)$                                                                              | 0.1186  | 4.3661  | 11.10 | (S2)     |
| $\theta_g = ((-0.0141 \pm 39.5451) \times E_{INT}) + (0.2175 \pm 8.6678)$                                                                              | -0.0415 | 0.0040  | 13.84 | (S3)     |
| $\theta_g = ((0.1165 \pm 5.7849) \times E_{Ring}) + (40.5636 \pm 23.1956)$                                                                             | -0.0416 | 0.0004  | 13.86 | (S4)     |
| $\theta_g = ((-0.0070 \pm 0.1918) \times E_{MF}) + ((0.7307 \pm 0.1318) \times E_{HB}) + (50.1589 \pm 5.7775)$                                         | 0.7918  | 48.5403 | 5.30  | (S5)     |
| $\theta_g = ((0.7062 \pm 0.0771) \times E_{HB}) + ((-0.0769 \pm 0.0694) \times E_{vdW}) + (44.5813 \pm 4.9802)$                                        | 0.8024  | 51.7479 | 4.99  | (S6)     |
| $\theta_g = ((-0.9578 \pm 0.1138) \times E_{MF}) + ((-0.3636 \pm 0.0704) \times E_{vdW}) + (52.0437 \pm 5.8522)$                                       | 0.7746  | 43.9652 | 5.49  | (S7)     |
| $\theta_g = ((-0.8991 \pm 0.1653) \times E_{MF}) + ((2.8594 \pm 3.9408) \times E_{Ring}) + (84.8779 \pm 17.6632)$                                      | 0.5245  | 14.7895 | 9.39  | (S8)     |
| $\theta_g = ((-0.2895 \pm 0.1413) \times E_{vdW}) + ((0.5986 \pm 5.4392) \times E_{Ring}) + (23.7297 \pm 23.2869)$                                     | 0.0808  | 2.0992  | 11.10 | (S9)     |
| $\theta_g = ((-0.3733 \pm 0.2782) \times E_{MF}) + ((0.4561 \pm 0.2012) \times E_{HB}) + ((-0.1811 \pm 0.1034) \times E_{vdW}) + (48.3177 \pm 5.6326)$ | 0.8090  | 36.2980 | 4.91  | (S10)    |

Table S3. Correlation between experimental contact angles of ILs on the polar Al-plate surface,  $\theta_{Al}$ , with cation-anion interaction energies estimated using COSMO-RS along with the correlation coefficient,  $R^2$ , Fisher significance parameter,  $F$ , average absolute relative deviation, AARD.

|                                                                                                                                                            | $R^2$   | $F$      | AARD/% | Equation |
|------------------------------------------------------------------------------------------------------------------------------------------------------------|---------|----------|--------|----------|
| $\theta_{Al} = ((-1.2595 \pm 0.1899) \times E_{MF}) + (92.1915 \pm 7.1305)$                                                                                | 0.6324  | 44.0086  | 9.73   | (S11)    |
| $\theta_{Al} = ((-0.3846 \pm 0.1816) \times E_{vdW}) + (20.5559 \pm 11.9039)$                                                                              | 0.1222  | 4.4831   | 13.83  | (S12)    |
| $\theta_{Al} = ((0.0320 \pm 0.2864) \times E_{INT}) + (46.7448 \pm 11.4138)$                                                                               | -0.0415 | 0.0040   | 13.84  | (S13)    |
| $\theta_{Al} = ((-5.3405 \pm 7.5405) \times E_{Ring}) + (24.1149 \pm 30.2355)$                                                                             | -0.0203 | 0.5016   | 15.47  | (S14)    |
| $\theta_{Al} = ((-0.0314 \pm 0.1453) \times E_{MF}) + ((1.0236 \pm 0.0998) \times E_{HB}) + (60.3833 \pm 4.3775)$                                          | 0.9311  | 169.9155 | 3.91   | (S15)    |
| $\theta_{Al} = ((1.0113 \pm 0.0570) \times E_{HB}) + ((-0.0813 \pm 0.0513) \times E_{vdW}) + (53.7848 \pm 3.6810)$                                         | 0.9377  | 189.3162 | 3.54   | (S16)    |
| $\theta_{Al} = ((-1.3595 \pm 0.1044) \times E_{MF}) + ((-0.4908 \pm 0.0647) \times E_{vdW}) + (64.0847 \pm 5.3706)$                                        | 0.8906  | 102.7360 | 4.60   | (S17)    |
| $\theta_{Al} = ((-1.2514 \pm 0.1951) \times E_{MF}) + ((-1.5229 \pm 4.6509) \times E_{Ring}) + (85.7937 \pm 20.8460)$                                      | 0.6182  | 21.2394  | 9.66   | (S18)    |
| $\theta_{Al} = ((-0.3793 \pm 0.1839) \times E_{vdW}) + ((-4.7088 \pm 7.0831) \times E_{Ring}) + (2.0548 \pm 30.3247)$                                      | 0.1014  | 2.4104   | 13.64  | (S19)    |
| $\theta_{Al} = ((-0.4494 \pm 0.1913) \times E_{MF}) + ((0.7103 \pm 0.1383) \times E_{HB}) + ((-0.2067 \pm 0.0711) \times E_{Ring}) + (48.3177 \pm 5.6326)$ | 0.8090  | 36.2980  | 4.91   | (S20)    |

Table S4. Correlation between experimental contact angles of ILs on the nonpolar Teflon surface,  $\theta_T$ , with cation-anion interaction energies estimated using COSMO-RS along with the correlation coefficient,  $R^2$ , Fisher significance parameter,  $F$ , average absolute relative deviation, AARD.

|                                                                                                                                                         | $R^2$   | $F$      | ARD/% | Equation |
|---------------------------------------------------------------------------------------------------------------------------------------------------------|---------|----------|-------|----------|
| $\theta_T = ((1.1949 \pm 0.1842) \times E_{MF}) + (27.3679 \pm 6.9191)$                                                                                 | 0.6216  | 42.0710  | 5.74  | (S21)    |
| $\theta_T = ((0.3592 \pm 0.1745) \times E_{vdW}) + (94.9605 \pm 11.4345)$                                                                               | 0.1145  | 4.2373   | 7.77  | (S22)    |
| $\theta_T = ((-0.0424 \pm 0.2738) \times E_{INT}) + (70.0134 \pm 19.9138)$                                                                              | -0.0406 | 0.0239   | 10.03 | (S23)    |
| $\theta_T = ((3.3591 \pm 7.2545) \times E_{Ring}) + (85.1209 \pm 29.0887)$                                                                              | -0.0324 | 0.2144   | 9.94  | (S24)    |
| $\theta_T = ((0.0393 \pm 0.1591) \times E_{MF}) + ((-0.9632 \pm 0.1093) \times E_{HB}) + (57.2996 \pm 4.7905)$                                          | 0.9097  | 127.0615 | 2.68  | (S25)    |
| $\theta_T = ((-0.9591 \pm 0.0715) \times E_{HB}) + ((0.0715 \pm 0.0572) \times E_{vdW}) + (63.4504 \pm 4.1067)$                                         | 0.9153  | 136.0847 | 2.53  | (S26)    |
| $\theta_T = ((1.2886 \pm 0.1096) \times E_{MF}) + ((0.4598 \pm 0.0678) \times E_{vdW}) + (53.7009 \pm 5.6363)$                                          | 0.8682  | 83.3756  | 2.89  | (S27)    |
| $\theta_T = ((1.1965 \pm 0.1897) \times E_{MF}) + ((-0.2912 \pm 4.5231) \times E_{Ring}) + (26.1444 \pm 20.2729)$                                       | 0.6052  | 20.1647  | 5.75  | (S28)    |
| $\theta_T = ((-0.3561 \pm 0.1777) \times E_{vdW}) + ((2.7661 \pm 6.8446) \times E_{Ring}) + (105.8287 \pm 29.3037)$                                     | 0.0826  | 2.1264   | 7.72  | (S29)    |
| $\theta_T = ((-0.4222 \pm 0.2211) \times E_{MF}) + ((-0.6762 \pm 0.1598) \times E_{HB}) + ((0.1893 \pm 0.0821) \times E_{Ring}) + (59.2244 \pm 4.4741)$ | 0.8090  | 36.2980  | 4.91  | (S30)    |

Table S5. Full name, abbreviation, and numbering of IL cation and anion.

| No.           | Name                                     | Abbreviations                       |
|---------------|------------------------------------------|-------------------------------------|
| <b>Cation</b> |                                          |                                     |
| 1             | 1,3-dimethylimidazolium                  | [C <sub>1</sub> C <sub>1</sub> im]  |
| 2             | 1-ethyl-3-methylimidazolium              | [C <sub>2</sub> C <sub>1</sub> im]  |
| 3             | 1-propyl-3-methylimidazolium             | [C <sub>3</sub> C <sub>1</sub> im]  |
| 4             | 1-butyl-3-methylimidazolium              | [C <sub>4</sub> C <sub>1</sub> im]  |
| 5             | 1-pentyl-3-methylimidazolium             | [C <sub>5</sub> C <sub>1</sub> im]  |
| 6             | 1-hexyl-3-methylimidazolium              | [C <sub>6</sub> C <sub>1</sub> im]  |
| 7             | 1-heptyl-3-methylimidazolium             | [C <sub>7</sub> C <sub>1</sub> im]  |
| 8             | 1-octyl-3-methylimidazolium              | [C <sub>8</sub> C <sub>1</sub> im]  |
| 9             | 1-nonyl-3-methylimidazolium              | [C <sub>9</sub> C <sub>1</sub> im]  |
| 10            | 1-decyl-3-methylimidazolium              | [C <sub>10</sub> C <sub>1</sub> im] |
| <b>Anion</b>  |                                          |                                     |
| 1             | Acetate                                  | [Ac]                                |
| 2             | Propionate                               | [Pro]                               |
| 3             | Butanoate                                | [But]                               |
| 4             | Pentanoate                               | [Pen]                               |
| 5             | Hexanoate                                | [Hex]                               |
| 6             | Decanoate                                | [Dec]                               |
| 7             | Trifluoroacetate                         | [TFA]                               |
| 8             | Heptafluorobutanoate                     | [HFBu]                              |
| 9             | Bis(2,4,4-trimethylpentyl)phosphinate    | [Tm2P]                              |
| 10            | Bis(pentafluoroethyl)phosphinate         | [Pf2P]                              |
| 11            | Dimethylphosphate                        | [DMP]                               |
| 12            | Diethylphosphate                         | [DEP]                               |
| 13            | Dibutylphosphate                         | [DBP]                               |
| 14            | Tris(pentafluoroethyl)trifluorophosphate | [eFAP]                              |
| 15            | Tris(nonafluorobutyl)trifluorophosphate  | [bFAP]                              |
| 16            | Chloride                                 | Cl                                  |
| 17            | Bromide                                  | Br                                  |
| 18            | Iodide                                   | I                                   |
| 19            | Triiodide                                | [I <sub>3</sub> ]                   |
| 20            | Methanesulfonate                         | [CH <sub>3</sub> SO <sub>3</sub> ]  |
| 21            | Trifluoromethanesulfonate                | [CF <sub>3</sub> SO <sub>3</sub> ]  |
| 22            | Perfluorobutanesulfonate                 | [PfbSO <sub>3</sub> ]               |
| 23            | Perchlorate                              | [ClO <sub>4</sub> ]                 |
| 24            | Nitrate                                  | [NO <sub>3</sub> ]                  |
| 25            | Hydrogensulfate                          | [HSO <sub>4</sub> ]                 |
| 26            | Methylsulfate                            | [MeSO <sub>4</sub> ]                |
| 27            | Ethylsulfate                             | [EtSO <sub>4</sub> ]                |
| 28            | Butylsulfate                             | [BuSO <sub>4</sub> ]                |
| 29            | Octylsulfate                             | [OcSO <sub>4</sub> ]                |

|    |                                      |                          |
|----|--------------------------------------|--------------------------|
| 30 | Methoxyethylsulfate                  | [MeOEtSO <sub>4</sub> ]  |
| 31 | Ethoxyethylsulfate                   | [EtOEtSO <sub>4</sub> ]  |
| 32 | 2-(2-methoxyethoxy)ethylsulfate      | [MeOEtOSO <sub>4</sub> ] |
| 33 | Thiocyanate                          | [SCN]                    |
| 34 | Dicyanamide                          | [N(CN) <sub>2</sub> ]    |
| 35 | Tricyanomethanide                    | [C(CN) <sub>3</sub> ]    |
| 36 | Tetracyanoborate                     | [B(CN) <sub>4</sub> ]    |
| 37 | Chlorotrifluoroborate                | [BClF <sub>3</sub> ]     |
| 38 | Tetrafluoroborate                    | [BF <sub>4</sub> ]       |
| 39 | Tetrachloroborate                    | [BCl <sub>4</sub> ]      |
| 40 | Hexafluorophosphate                  | [PF <sub>6</sub> ]       |
| 41 | Hexafluoroarsenate                   | [AsF <sub>6</sub> ]      |
| 42 | Hexafluoroantimonate                 | [SbF <sub>6</sub> ]      |
| 43 | Bis(trifluoromethyl)imide            | [BETI]                   |
| 44 | Bis(trifluoromethylsulfonyl)amide    | [Tf <sub>2</sub> N]      |
| 45 | Bis(pentafluoroethylsulfonyl)amide   | [Pf <sub>2</sub> N]      |
| 46 | Imidodiphosphorylfluoride            | [Impf]                   |
| 47 | Bis(trifluoromethylsulfonyl)methide  | [Tf <sub>2</sub> C]      |
| 48 | Tris(trifluoromethylsulfonyl)methide | [Tf <sub>3</sub> C]      |

---



Table S6. Cation-anion interaction energies and the predicted contact angles on the glass, Al-plate, and PTFE surfaces using Equations 3, 5, and 7, respectively.

| Ionic Liquids  | Interaction Energy/kJ·mol <sup>-1</sup> |          |          |           |            | Contact Angle/° |          |        |
|----------------|-----------------------------------------|----------|----------|-----------|------------|-----------------|----------|--------|
|                | $E_{INT}$                               | $E_{MF}$ | $E_{HB}$ | $E_{vdW}$ | $E_{Ring}$ | Glass           | Al-plate | PTFE   |
| [C1C1im][Ac]   | -30.85                                  | 54.94    | -41.99   | -43.80    | -3.91      | 17.18           | 14.22    | 101.62 |
| [C2C1im][Ac]   | -32.20                                  | 55.42    | -40.63   | -47.38    | -3.91      | 18.32           | 15.74    | 100.15 |
| [C3C1im][Ac]   | -35.24                                  | 55.29    | -40.07   | -51.16    | -3.91      | 18.78           | 16.37    | 99.54  |
| [C4C1im][Ac]   | -39.39                                  | 55.32    | -39.72   | -55.53    | -3.91      | 19.07           | 16.76    | 99.17  |
| [C5C1im][Ac]   | -43.09                                  | 55.21    | -39.67   | -59.42    | -3.91      | 19.12           | 16.82    | 99.11  |
| [C6C1im][Ac]   | -46.82                                  | 55.38    | -39.44   | -63.52    | -3.91      | 19.31           | 17.08    | 98.86  |
| [C7C1im][Ac]   | -50.81                                  | 55.56    | -39.55   | -67.57    | -3.91      | 19.21           | 16.95    | 98.99  |
| [C8C1im][Ac]   | -54.65                                  | 55.96    | -39.18   | -71.82    | -3.91      | 19.53           | 17.37    | 98.58  |
| [C9C1im][Ac]   | -57.67                                  | 56.22    | -39.19   | -75.74    | -3.91      | 19.52           | 17.36    | 98.59  |
| [C10C1im][Ac]  | -61.50                                  | 56.86    | -38.72   | -80.03    | -3.91      | 19.91           | 17.89    | 98.08  |
| [C1C1im][Pro]  | -36.64                                  | 52.53    | -41.48   | -47.69    | -3.91      | 17.61           | 14.80    | 101.06 |
| [C2C1im][Pro]  | -37.68                                  | 53.41    | -40.19   | -51.31    | -3.91      | 18.68           | 16.23    | 99.67  |
| [C3C1im][Pro]  | -40.51                                  | 53.59    | -39.70   | -55.11    | -3.91      | 19.09           | 16.79    | 99.14  |
| [C4C1im][Pro]  | -44.43                                  | 53.87    | -39.38   | -59.49    | -3.91      | 19.36           | 17.15    | 98.79  |
| [C5C1im][Pro]  | -48.01                                  | 53.93    | -39.35   | -63.38    | -3.91      | 19.38           | 17.17    | 98.77  |
| [C6C1im][Pro]  | -51.63                                  | 54.23    | -39.14   | -67.48    | -3.91      | 19.56           | 17.41    | 98.54  |
| [C7C1im][Pro]  | -55.56                                  | 54.50    | -39.27   | -71.55    | -3.91      | 19.45           | 17.26    | 98.68  |
| [C8C1im][Pro]  | -59.36                                  | 54.96    | -38.92   | -75.79    | -3.91      | 19.74           | 17.66    | 98.30  |
| [C9C1im][Pro]  | -62.35                                  | 55.28    | -38.93   | -79.73    | -3.91      | 19.73           | 17.65    | 98.31  |
| [C10C1im][Pro] | -66.16                                  | 55.93    | -38.48   | -84.01    | -3.91      | 20.11           | 18.16    | 97.82  |
| [C1C1im][But]  | -40.53                                  | 52.52    | -41.36   | -51.68    | -3.91      | 17.70           | 14.92    | 100.94 |
| [C2C1im][But]  | -41.43                                  | 53.57    | -40.10   | -55.33    | -3.91      | 18.76           | 16.34    | 99.57  |

|                |        |       |        |        |       |       |       |        |
|----------------|--------|-------|--------|--------|-------|-------|-------|--------|
| [C3C1im][But]  | -44.17 | 53.89 | -39.63 | -59.14 | -3.91 | 19.15 | 16.87 | 99.06  |
| [C4C1im][But]  | -48.00 | 54.28 | -39.32 | -63.53 | -3.91 | 19.41 | 17.21 | 98.73  |
| [C5C1im][But]  | -51.55 | 54.41 | -39.31 | -67.44 | -3.91 | 19.41 | 17.22 | 98.73  |
| [C6C1im][But]  | -55.14 | 54.76 | -39.11 | -71.55 | -3.91 | 19.58 | 17.45 | 98.51  |
| [C7C1im][But]  | -59.06 | 55.05 | -39.26 | -75.62 | -3.91 | 19.46 | 17.28 | 98.66  |
| [C8C1im][But]  | -62.85 | 55.53 | -38.91 | -79.87 | -3.91 | 19.75 | 17.67 | 98.29  |
| [C9C1im][But]  | -65.83 | 55.87 | -38.92 | -83.81 | -3.91 | 19.74 | 17.65 | 98.31  |
| [C10C1im][But] | -69.64 | 56.52 | -38.47 | -88.09 | -3.91 | 20.11 | 18.16 | 97.82  |
| [C1C1im][Pen]  | -44.29 | 52.64 | -41.18 | -55.75 | -3.91 | 17.85 | 15.12 | 100.74 |
| [C2C1im][Pen]  | -45.13 | 53.79 | -39.93 | -59.42 | -3.91 | 18.90 | 16.53 | 99.39  |
| [C3C1im][Pen]  | -47.82 | 54.18 | -39.48 | -63.24 | -3.91 | 19.28 | 17.04 | 98.90  |
| [C4C1im][Pen]  | -51.59 | 54.65 | -39.18 | -67.64 | -3.91 | 19.52 | 17.37 | 98.58  |
| [C5C1im][Pen]  | -55.11 | 54.83 | -39.18 | -71.56 | -3.91 | 19.52 | 17.37 | 98.58  |
| [C6C1im][Pen]  | -58.68 | 55.21 | -38.99 | -75.67 | -3.91 | 19.68 | 17.58 | 98.38  |
| [C7C1im][Pen]  | -62.59 | 55.53 | -39.14 | -79.74 | -3.91 | 19.56 | 17.41 | 98.54  |
| [C8C1im][Pen]  | -66.37 | 56.02 | -38.80 | -83.99 | -3.91 | 19.84 | 17.79 | 98.17  |
| [C9C1im][Pen]  | -69.36 | 56.36 | -38.82 | -87.94 | -3.91 | 19.83 | 17.77 | 98.19  |
| [C10C1im][Pen] | -73.17 | 57.03 | -38.38 | -92.22 | -3.91 | 20.20 | 18.27 | 97.72  |
| [C1C1im][Hex]  | -47.90 | 52.89 | -41.03 | -59.76 | -3.91 | 17.98 | 15.30 | 100.58 |
| [C2C1im][Hex]  | -48.71 | 54.07 | -39.77 | -63.45 | -3.91 | 19.03 | 16.70 | 99.22  |
| [C3C1im][Hex]  | -51.40 | 54.51 | -39.34 | -67.28 | -3.91 | 19.39 | 17.19 | 98.75  |
| [C4C1im][Hex]  | -55.12 | 55.03 | -39.05 | -71.69 | -3.91 | 19.63 | 17.51 | 98.44  |
| [C5C1im][Hex]  | -58.63 | 55.24 | -39.06 | -75.61 | -3.91 | 19.62 | 17.50 | 98.46  |
| [C6C1im][Hex]  | -62.18 | 55.65 | -38.87 | -79.72 | -3.91 | 19.78 | 17.71 | 98.25  |
| [C7C1im][Hex]  | -66.10 | 55.97 | -39.03 | -83.80 | -3.91 | 19.65 | 17.54 | 98.42  |
| [C8C1im][Hex]  | -69.87 | 56.48 | -38.69 | -88.05 | -3.91 | 19.93 | 17.91 | 98.06  |
| [C9C1im][Hex]  | -72.87 | 56.82 | -38.72 | -92.00 | -3.91 | 19.91 | 17.88 | 98.09  |
| [C10C1im][Hex] | -76.69 | 57.48 | -38.28 | -96.29 | -3.91 | 20.27 | 18.37 | 97.62  |

|                |        |       |        |         |       |       |       |       |
|----------------|--------|-------|--------|---------|-------|-------|-------|-------|
| [C1C1im][Dec]  | -61.96 | 54.26 | -40.08 | -76.13  | -3.91 | 18.78 | 16.36 | 99.55 |
| [C2C1im][Dec]  | -62.79 | 55.44 | -38.83 | -79.85  | -3.91 | 19.81 | 17.75 | 98.21 |
| [C3C1im][Dec]  | -65.49 | 55.93 | -38.43 | -83.71  | -3.91 | 20.15 | 18.20 | 97.78 |
| [C4C1im][Dec]  | -69.13 | 56.54 | -38.16 | -88.13  | -3.91 | 20.37 | 18.51 | 97.48 |
| [C5C1im][Dec]  | -72.66 | 56.80 | -38.20 | -92.06  | -3.91 | 20.35 | 18.47 | 97.52 |
| [C6C1im][Dec]  | -76.21 | 57.23 | -38.02 | -96.19  | -3.91 | 20.49 | 18.66 | 97.33 |
| [C7C1im][Dec]  | -80.13 | 57.57 | -38.19 | -100.28 | -3.91 | 20.35 | 18.47 | 97.52 |
| [C8C1im][Dec]  | -83.90 | 58.09 | -37.87 | -104.53 | -3.91 | 20.61 | 18.83 | 97.17 |
| [C9C1im][Dec]  | -86.93 | 58.44 | -37.91 | -108.49 | -3.91 | 20.59 | 18.80 | 97.21 |
| [C10C1im][Dec] | -90.75 | 59.09 | -37.48 | -112.78 | -3.91 | 20.94 | 19.27 | 96.75 |
| [C1C1im][TFA]  | -34.32 | 32.49 | -25.61 | -41.20  | -3.91 | 30.84 | 32.57 | 83.94 |
| [C2C1im][TFA]  | -33.83 | 34.74 | -24.54 | -44.68  | -3.91 | 31.73 | 33.76 | 82.79 |
| [C3C1im][TFA]  | -35.92 | 35.96 | -24.32 | -48.36  | -3.91 | 31.91 | 34.01 | 82.55 |
| [C4C1im][TFA]  | -38.48 | 37.24 | -23.93 | -52.67  | -3.91 | 32.24 | 34.45 | 82.13 |
| [C5C1im][TFA]  | -41.37 | 38.07 | -23.93 | -56.50  | -3.91 | 32.23 | 34.44 | 82.13 |
| [C6C1im][TFA]  | -44.30 | 39.02 | -23.74 | -60.54  | -3.91 | 32.40 | 34.66 | 81.93 |
| [C7C1im][TFA]  | -47.49 | 39.88 | -23.75 | -64.57  | -3.91 | 32.38 | 34.65 | 81.94 |
| [C8C1im][TFA]  | -50.82 | 40.82 | -23.47 | -68.76  | -3.91 | 32.62 | 34.96 | 81.64 |
| [C9C1im][TFA]  | -53.44 | 41.56 | -23.46 | -72.66  | -3.91 | 32.63 | 34.98 | 81.62 |
| [C10C1im][TFA] | -56.85 | 42.53 | -23.07 | -76.90  | -3.91 | 32.95 | 35.41 | 81.20 |
| [C1C1im][HFBu] | -36.11 | 34.08 | -23.70 | -47.57  | -3.91 | 32.43 | 34.71 | 81.88 |
| [C2C1im][HFBu] | -36.03 | 35.77 | -22.70 | -50.92  | -3.91 | 33.27 | 35.83 | 80.80 |
| [C3C1im][HFBu] | -38.27 | 36.82 | -22.53 | -54.47  | -3.91 | 33.40 | 36.02 | 80.62 |
| [C4C1im][HFBu] | -40.77 | 38.00 | -22.16 | -58.64  | -3.91 | 33.72 | 36.44 | 80.22 |
| [C5C1im][HFBu] | -43.70 | 38.77 | -22.18 | -62.38  | -3.91 | 33.69 | 36.41 | 80.25 |
| [C6C1im][HFBu] | -46.61 | 39.62 | -22.00 | -66.32  | -3.91 | 33.84 | 36.61 | 80.05 |
| [C7C1im][HFBu] | -49.83 | 40.39 | -22.02 | -70.26  | -3.91 | 33.83 | 36.59 | 80.07 |
| [C8C1im][HFBu] | -53.18 | 41.23 | -21.77 | -74.36  | -3.91 | 34.04 | 36.87 | 79.80 |

|                 |         |       |        |         |       |       |       |       |
|-----------------|---------|-------|--------|---------|-------|-------|-------|-------|
| [C9C1im][HFBu]  | -55.85  | 41.89 | -21.75 | -78.20  | -3.91 | 34.06 | 36.89 | 79.78 |
| [C10C1im][HFBu] | -59.27  | 42.75 | -21.39 | -82.36  | -3.91 | 34.36 | 37.30 | 79.39 |
| [C1C1im][Tm2P]  | -85.11  | 52.45 | -39.76 | -97.80  | -3.91 | 19.04 | 16.72 | 99.21 |
| [C2C1im][Tm2P]  | -86.27  | 53.32 | -38.56 | -101.53 | -3.91 | 20.04 | 18.07 | 97.91 |
| [C3C1im][Tm2P]  | -89.15  | 53.73 | -38.20 | -105.40 | -3.91 | 20.35 | 18.47 | 97.52 |
| [C4C1im][Tm2P]  | -92.79  | 54.30 | -37.93 | -109.82 | -3.91 | 20.57 | 18.77 | 97.23 |
| [C5C1im][Tm2P]  | -96.40  | 54.56 | -38.01 | -113.77 | -3.91 | 20.50 | 18.67 | 97.32 |
| [C6C1im][Tm2P]  | -99.95  | 55.00 | -37.85 | -117.89 | -3.91 | 20.63 | 18.86 | 97.15 |
| [C7C1im][Tm2P]  | -103.94 | 55.32 | -38.05 | -121.99 | -3.91 | 20.47 | 18.64 | 97.36 |
| [C8C1im][Tm2P]  | -107.72 | 55.82 | -37.74 | -126.24 | -3.91 | 20.72 | 18.98 | 97.03 |
| [C9C1im][Tm2P]  | -110.80 | 56.17 | -37.77 | -130.21 | -3.91 | 20.70 | 18.94 | 97.06 |
| [C10C1im][Tm2P] | -114.67 | 56.76 | -37.38 | -134.49 | -3.91 | 21.03 | 19.38 | 96.64 |
| [C1C1im][Pf2P]  | -37.06  | 32.53 | -18.07 | -52.84  | -3.91 | 37.12 | 41.01 | 75.81 |
| [C2C1im][Pf2P]  | -37.51  | 33.61 | -17.20 | -56.08  | -3.91 | 37.85 | 41.99 | 74.87 |
| [C3C1im][Pf2P]  | -39.99  | 34.52 | -17.11 | -59.53  | -3.91 | 37.93 | 42.09 | 74.77 |
| [C4C1im][Pf2P]  | -42.37  | 35.60 | -16.74 | -63.60  | -3.91 | 38.23 | 42.50 | 74.38 |
| [C5C1im][Pf2P]  | -45.30  | 36.38 | -16.77 | -67.28  | -3.91 | 38.21 | 42.47 | 74.41 |
| [C6C1im][Pf2P]  | -48.17  | 37.21 | -16.61 | -71.13  | -3.91 | 38.34 | 42.65 | 74.23 |
| [C7C1im][Pf2P]  | -51.32  | 37.95 | -16.59 | -75.00  | -3.91 | 38.35 | 42.67 | 74.22 |
| [C8C1im][Pf2P]  | -54.66  | 38.76 | -16.38 | -79.03  | -3.91 | 38.53 | 42.91 | 73.99 |
| [C9C1im][Pf2P]  | -57.36  | 39.41 | -16.35 | -82.82  | -3.91 | 38.56 | 42.94 | 73.95 |
| [C10C1im][Pf2P] | -60.78  | 40.17 | -16.03 | -86.91  | -3.91 | 38.82 | 43.29 | 73.61 |
| [C1C1im][DMP]   | -35.15  | 50.96 | -34.82 | -53.25  | -3.91 | 23.16 | 22.26 | 93.88 |
| [C2C1im][DMP]   | -35.20  | 52.50 | -33.27 | -56.86  | -3.91 | 24.45 | 23.98 | 92.21 |
| [C3C1im][DMP]   | -37.78  | 52.98 | -32.80 | -60.65  | -3.91 | 24.84 | 24.51 | 91.70 |
| [C4C1im][DMP]   | -41.26  | 53.52 | -32.35 | -65.03  | -3.91 | 25.21 | 25.01 | 91.22 |
| [C5C1im][DMP]   | -44.69  | 53.73 | -32.30 | -68.92  | -3.91 | 25.26 | 25.08 | 91.16 |
| [C6C1im][DMP]   | -48.16  | 54.17 | -32.08 | -73.02  | -3.91 | 25.44 | 25.32 | 90.93 |

|                |        |       |        |         |       |       |       |       |
|----------------|--------|-------|--------|---------|-------|-------|-------|-------|
| [C7C1im][DMP]  | -51.79 | 54.63 | -32.10 | -77.08  | -3.91 | 25.43 | 25.30 | 90.94 |
| [C8C1im][DMP]  | -55.44 | 55.24 | -31.74 | -81.32  | -3.91 | 25.72 | 25.70 | 90.56 |
| [C9C1im][DMP]  | -58.35 | 55.65 | -31.76 | -85.25  | -3.91 | 25.71 | 25.68 | 90.57 |
| [C10C1im][DMP] | -61.93 | 56.46 | -31.26 | -89.53  | -3.91 | 26.13 | 26.24 | 90.04 |
| [C1C1im][DEP]  | -44.23 | 51.48 | -35.16 | -61.56  | -3.91 | 22.88 | 21.88 | 94.24 |
| [C2C1im][DEP]  | -44.07 | 53.26 | -33.62 | -65.21  | -3.91 | 24.16 | 23.59 | 92.59 |
| [C3C1im][DEP]  | -46.53 | 53.94 | -33.19 | -69.03  | -3.91 | 24.52 | 24.08 | 92.12 |
| [C4C1im][DEP]  | -49.86 | 54.66 | -32.77 | -73.42  | -3.91 | 24.87 | 24.55 | 91.67 |
| [C5C1im][DEP]  | -53.23 | 54.98 | -32.74 | -77.33  | -3.91 | 24.89 | 24.58 | 91.63 |
| [C6C1im][DEP]  | -56.66 | 55.49 | -32.54 | -81.44  | -3.91 | 25.06 | 24.81 | 91.42 |
| [C7C1im][DEP]  | -60.27 | 56.00 | -32.57 | -85.51  | -3.91 | 25.03 | 24.77 | 91.45 |
| [C8C1im][DEP]  | -63.91 | 56.63 | -32.23 | -89.76  | -3.91 | 25.32 | 25.15 | 91.09 |
| [C9C1im][DEP]  | -66.84 | 57.06 | -32.25 | -93.69  | -3.91 | 25.30 | 25.12 | 91.11 |
| [C10C1im][DEP] | -70.43 | 57.86 | -31.76 | -97.98  | -3.91 | 25.71 | 25.67 | 90.58 |
| [C1C1im][DBP]  | -57.54 | 52.99 | -34.20 | -77.75  | -3.91 | 23.68 | 22.95 | 93.21 |
| [C2C1im][DBP]  | -57.47 | 54.74 | -32.71 | -81.45  | -3.91 | 24.92 | 24.61 | 91.61 |
| [C3C1im][DBP]  | -59.98 | 55.49 | -32.35 | -85.29  | -3.91 | 25.22 | 25.02 | 91.21 |
| [C4C1im][DBP]  | -63.23 | 56.30 | -31.95 | -89.70  | -3.91 | 25.55 | 25.46 | 90.79 |
| [C5C1im][DBP]  | -66.62 | 56.70 | -31.96 | -93.63  | -3.91 | 25.54 | 25.45 | 90.80 |
| [C6C1im][DBP]  | -70.03 | 57.25 | -31.78 | -97.75  | -3.91 | 25.69 | 25.65 | 90.60 |
| [C7C1im][DBP]  | -73.69 | 57.76 | -31.85 | -101.84 | -3.91 | 25.64 | 25.58 | 90.67 |
| [C8C1im][DBP]  | -77.34 | 58.39 | -31.53 | -106.09 | -3.91 | 25.90 | 25.94 | 90.33 |
| [C9C1im][DBP]  | -80.33 | 58.81 | -31.57 | -110.04 | -3.91 | 25.87 | 25.90 | 90.37 |
| [C10C1im][DBP] | -83.95 | 59.59 | -31.10 | -114.33 | -3.91 | 26.26 | 26.42 | 89.87 |
| [C1C1im][eFAP] | -21.90 | 35.51 | -0.73  | -56.72  | -3.91 | 51.58 | 60.43 | 57.10 |
| [C2C1im][eFAP] | -23.95 | 35.24 | -0.66  | -59.84  | -3.91 | 51.63 | 60.51 | 57.03 |
| [C3C1im][eFAP] | -26.94 | 35.87 | -0.66  | -63.19  | -3.91 | 51.64 | 60.52 | 57.02 |
| [C4C1im][eFAP] | -29.59 | 36.54 | -0.62  | -67.13  | -3.91 | 51.67 | 60.55 | 56.99 |

|                 |        |       |        |         |       |       |       |       |
|-----------------|--------|-------|--------|---------|-------|-------|-------|-------|
| [C5C1im][eFAP]  | -32.60 | 37.37 | -0.62  | -70.75  | -3.91 | 51.67 | 60.56 | 56.98 |
| [C6C1im][eFAP]  | -35.62 | 38.07 | -0.60  | -74.51  | -3.91 | 51.68 | 60.58 | 56.97 |
| [C7C1im][eFAP]  | -38.78 | 38.75 | -0.59  | -78.32  | -3.91 | 51.69 | 60.59 | 56.95 |
| [C8C1im][eFAP]  | -42.31 | 39.41 | -0.58  | -82.26  | -3.91 | 51.70 | 60.61 | 56.94 |
| [C9C1im][eFAP]  | -45.25 | 40.04 | -0.57  | -86.01  | -3.91 | 51.71 | 60.61 | 56.93 |
| [C10C1im][eFAP] | -48.93 | 40.52 | -0.55  | -90.01  | -3.91 | 51.73 | 60.64 | 56.91 |
| [C1C1im][bFAP]  | -37.36 | 40.73 | -0.77  | -77.33  | -3.91 | 51.55 | 60.39 | 57.14 |
| [C2C1im][bFAP]  | -39.75 | 40.00 | -0.70  | -80.33  | -3.91 | 51.60 | 60.47 | 57.07 |
| [C3C1im][bFAP]  | -43.02 | 40.20 | -0.70  | -83.55  | -3.91 | 51.60 | 60.47 | 57.07 |
| [C4C1im][bFAP]  | -45.86 | 40.51 | -0.67  | -87.30  | -3.91 | 51.63 | 60.51 | 57.03 |
| [C5C1im][bFAP]  | -49.00 | 41.05 | -0.66  | -90.76  | -3.91 | 51.63 | 60.51 | 57.03 |
| [C6C1im][bFAP]  | -52.10 | 41.50 | -0.65  | -94.36  | -3.91 | 51.64 | 60.52 | 57.02 |
| [C7C1im][bFAP]  | -55.34 | 41.93 | -0.64  | -98.00  | -3.91 | 51.65 | 60.53 | 57.01 |
| [C8C1im][bFAP]  | -58.90 | 42.39 | -0.63  | -101.78 | -3.91 | 51.66 | 60.55 | 56.99 |
| [C9C1im][bFAP]  | -61.89 | 42.83 | -0.62  | -105.37 | -3.91 | 51.67 | 60.56 | 56.99 |
| [C10C1im][bFAP] | -65.58 | 43.13 | -0.60  | -109.21 | -3.91 | 51.68 | 60.58 | 56.96 |
| [C1C1im]Cl      | -14.65 | 60.18 | -32.97 | -41.86  | -3.91 | 24.70 | 24.33 | 91.88 |
| [C2C1im]Cl      | -17.20 | 59.25 | -31.45 | -45.39  | -3.91 | 25.97 | 26.02 | 90.25 |
| [C3C1im]Cl      | -21.13 | 58.14 | -30.84 | -49.13  | -3.91 | 26.48 | 26.71 | 89.59 |
| [C4C1im]Cl      | -25.87 | 57.39 | -30.34 | -53.49  | -3.91 | 26.89 | 27.27 | 89.05 |
| [C5C1im]Cl      | -29.97 | 56.78 | -30.17 | -57.38  | -3.91 | 27.04 | 27.46 | 88.86 |
| [C6C1im]Cl      | -33.99 | 56.60 | -29.90 | -61.46  | -3.91 | 27.26 | 27.76 | 88.58 |
| [C7C1im]Cl      | -38.02 | 56.57 | -29.85 | -65.52  | -3.91 | 27.30 | 27.82 | 88.52 |
| [C8C1im]Cl      | -42.01 | 56.80 | -29.46 | -69.76  | -3.91 | 27.63 | 28.25 | 88.10 |
| [C9C1im]Cl      | -45.16 | 56.90 | -29.45 | -73.67  | -3.91 | 27.64 | 28.27 | 88.08 |
| [C10C1im]Cl     | -48.97 | 57.52 | -28.95 | -77.96  | -3.91 | 28.05 | 28.83 | 87.54 |
| [C1C1im]Br      | -20.01 | 52.66 | -27.75 | -44.91  | -3.91 | 29.05 | 30.17 | 86.26 |
| [C2C1im]Br      | -21.83 | 52.36 | -26.30 | -48.36  | -3.91 | 30.26 | 31.80 | 84.68 |

|               |        |       |        |         |       |       |       |       |
|---------------|--------|-------|--------|---------|-------|-------|-------|-------|
| [C3C1im]Br    | -25.47 | 51.60 | -25.77 | -52.04  | -3.91 | 30.71 | 32.39 | 84.11 |
| [C4C1im]Br    | -29.71 | 51.25 | -25.22 | -56.43  | -3.91 | 31.16 | 33.01 | 83.52 |
| [C5C1im]Br    | -33.56 | 50.91 | -25.04 | -60.31  | -3.91 | 31.31 | 33.20 | 83.33 |
| [C6C1im]Br    | -37.28 | 51.01 | -24.77 | -64.37  | -3.91 | 31.54 | 33.51 | 83.03 |
| [C7C1im]Br    | -40.97 | 51.24 | -24.66 | -68.41  | -3.91 | 31.63 | 33.63 | 82.92 |
| [C8C1im]Br    | -44.76 | 51.69 | -24.29 | -72.65  | -3.91 | 31.94 | 34.05 | 82.51 |
| [C9C1im]Br    | -47.70 | 51.99 | -24.25 | -76.53  | -3.91 | 31.97 | 34.09 | 82.48 |
| [C10C1im]Br   | -51.32 | 52.77 | -23.77 | -80.82  | -3.91 | 32.37 | 34.63 | 81.95 |
| [C1C1im]I     | -29.89 | 42.55 | -22.05 | -50.39  | -3.91 | 33.80 | 36.55 | 80.10 |
| [C2C1im]I     | -30.59 | 43.27 | -20.63 | -53.81  | -3.91 | 34.98 | 38.14 | 78.57 |
| [C3C1im]I     | -33.65 | 43.20 | -20.18 | -57.46  | -3.91 | 35.36 | 38.65 | 78.09 |
| [C4C1im]I     | -37.09 | 43.52 | -19.61 | -61.82  | -3.91 | 35.84 | 39.29 | 77.47 |
| [C5C1im]I     | -40.46 | 43.69 | -19.44 | -65.69  | -3.91 | 35.98 | 39.48 | 77.28 |
| [C6C1im]I     | -43.74 | 44.22 | -19.16 | -69.74  | -3.91 | 36.21 | 39.79 | 76.99 |
| [C7C1im]I     | -46.98 | 44.85 | -19.00 | -73.78  | -3.91 | 36.34 | 39.97 | 76.82 |
| [C8C1im]I     | -50.45 | 45.63 | -18.66 | -78.00  | -3.91 | 36.63 | 40.35 | 76.45 |
| [C9C1im]I     | -53.13 | 46.22 | -18.60 | -81.89  | -3.91 | 36.68 | 40.41 | 76.39 |
| [C10C1im]I    | -56.49 | 47.23 | -18.15 | -86.16  | -3.91 | 37.05 | 40.92 | 75.90 |
| [C1C1im][I3]  | -59.86 | 23.55 | -3.47  | -79.94  | -3.91 | 49.29 | 57.37 | 60.06 |
| [C2C1im][I3]  | -59.46 | 25.49 | -3.12  | -83.01  | -3.91 | 49.58 | 57.76 | 59.68 |
| [C3C1im][I3]  | -60.75 | 27.66 | -3.05  | -86.33  | -3.91 | 49.64 | 57.83 | 59.61 |
| [C4C1im][I3]  | -62.18 | 29.64 | -2.89  | -90.40  | -3.91 | 49.77 | 58.01 | 59.44 |
| [C5C1im][I3]  | -64.33 | 31.32 | -2.85  | -94.11  | -3.91 | 49.81 | 58.06 | 59.39 |
| [C6C1im][I3]  | -66.62 | 32.81 | -2.78  | -97.99  | -3.91 | 49.87 | 58.14 | 59.31 |
| [C7C1im][I3]  | -69.14 | 34.18 | -2.71  | -101.90 | -3.91 | 49.92 | 58.21 | 59.24 |
| [C8C1im][I3]  | -72.14 | 35.47 | -2.63  | -105.98 | -3.91 | 49.99 | 58.30 | 59.16 |
| [C9C1im][I3]  | -74.55 | 36.61 | -2.60  | -109.80 | -3.91 | 50.01 | 58.34 | 59.13 |
| [C10C1im][I3] | -77.77 | 37.67 | -2.50  | -113.93 | -3.91 | 50.10 | 58.45 | 59.01 |

|                   |        |       |        |        |       |       |       |       |
|-------------------|--------|-------|--------|--------|-------|-------|-------|-------|
| [C1C1im][CH3SO3]  | -27.92 | 49.52 | -31.26 | -46.18 | -3.91 | 26.13 | 26.24 | 90.03 |
| [C2C1im][CH3SO3]  | -28.24 | 50.64 | -29.62 | -49.76 | -3.91 | 27.49 | 28.07 | 88.27 |
| [C3C1im][CH3SO3]  | -31.12 | 50.78 | -29.11 | -53.54 | -3.91 | 27.92 | 28.64 | 87.72 |
| [C4C1im][CH3SO3]  | -34.71 | 51.10 | -28.58 | -57.91 | -3.91 | 28.36 | 29.24 | 87.15 |
| [C5C1im][CH3SO3]  | -38.19 | 51.19 | -28.46 | -61.80 | -3.91 | 28.46 | 29.37 | 87.02 |
| [C6C1im][CH3SO3]  | -41.65 | 51.59 | -28.20 | -65.90 | -3.91 | 28.68 | 29.66 | 86.74 |
| [C7C1im][CH3SO3]  | -45.19 | 52.05 | -28.14 | -69.96 | -3.91 | 28.73 | 29.74 | 86.67 |
| [C8C1im][CH3SO3]  | -48.79 | 52.68 | -27.76 | -74.20 | -3.91 | 29.05 | 30.16 | 86.26 |
| [C9C1im][CH3SO3]  | -51.65 | 53.12 | -27.74 | -78.13 | -3.91 | 29.06 | 30.18 | 86.25 |
| [C10C1im][CH3SO3] | -55.15 | 54.00 | -27.23 | -82.42 | -3.91 | 29.49 | 30.75 | 85.69 |
| [C1C1im][CF3SO3]  | -34.78 | 28.10 | -18.62 | -44.26 | -3.91 | 36.67 | 40.40 | 76.40 |
| [C2C1im][CF3SO3]  | -33.69 | 30.66 | -17.43 | -47.72 | -3.91 | 37.66 | 41.73 | 75.11 |
| [C3C1im][CF3SO3]  | -35.50 | 32.22 | -17.19 | -51.38 | -3.91 | 37.86 | 42.00 | 74.86 |
| [C4C1im][CF3SO3]  | -37.51 | 33.82 | -16.71 | -55.65 | -3.91 | 38.26 | 42.54 | 74.34 |
| [C5C1im][CF3SO3]  | -40.12 | 34.91 | -16.64 | -59.47 | -3.91 | 38.31 | 42.61 | 74.27 |
| [C6C1im][CF3SO3]  | -42.79 | 36.05 | -16.43 | -63.48 | -3.91 | 38.49 | 42.85 | 74.04 |
| [C7C1im][CF3SO3]  | -45.63 | 37.13 | -16.32 | -67.49 | -3.91 | 38.58 | 42.98 | 73.92 |
| [C8C1im][CF3SO3]  | -48.76 | 38.24 | -16.04 | -71.67 | -3.91 | 38.82 | 43.29 | 73.62 |
| [C9C1im][CF3SO3]  | -51.28 | 39.11 | -15.99 | -75.56 | -3.91 | 38.85 | 43.34 | 73.57 |
| [C10C1im][CF3SO3] | -54.47 | 40.20 | -15.60 | -79.78 | -3.91 | 39.18 | 43.78 | 73.14 |
| [C1C1im][PfbSO3]  | -37.44 | 33.08 | -16.68 | -53.84 | -3.91 | 38.28 | 42.57 | 74.30 |
| [C2C1im][PfbSO3]  | -37.09 | 34.76 | -15.61 | -57.10 | -3.91 | 39.17 | 43.77 | 73.15 |
| [C3C1im][PfbSO3]  | -39.24 | 35.92 | -15.44 | -60.58 | -3.91 | 39.32 | 43.96 | 72.97 |
| [C4C1im][PfbSO3]  | -41.37 | 37.20 | -15.01 | -64.66 | -3.91 | 39.67 | 44.44 | 72.51 |
| [C5C1im][PfbSO3]  | -44.12 | 38.10 | -14.98 | -68.34 | -3.91 | 39.70 | 44.47 | 72.48 |
| [C6C1im][PfbSO3]  | -46.87 | 39.04 | -14.80 | -72.21 | -3.91 | 39.85 | 44.68 | 72.28 |
| [C7C1im][PfbSO3]  | -49.81 | 39.92 | -14.71 | -76.09 | -3.91 | 39.92 | 44.78 | 72.18 |
| [C8C1im][PfbSO3]  | -53.02 | 40.84 | -14.47 | -80.14 | -3.91 | 40.12 | 45.05 | 71.92 |



|                   |        |       |        |        |       |       |       |        |
|-------------------|--------|-------|--------|--------|-------|-------|-------|--------|
| [C9C1im][PfbSO3]  | -55.64 | 41.57 | -14.44 | -83.93 | -3.91 | 40.15 | 45.08 | 71.89  |
| [C10C1im][PfbSO3] | -58.89 | 42.47 | -14.08 | -88.03 | -3.91 | 40.45 | 45.48 | 71.51  |
| [C1C1im][ClO4]    | -32.89 | 22.95 | -14.84 | -41.00 | -3.91 | 39.81 | 44.63 | 72.33  |
| [C2C1im][ClO4]    | -31.34 | 25.99 | -13.61 | -44.57 | -3.91 | 40.84 | 46.01 | 71.00  |
| [C3C1im][ClO4]    | -32.98 | 27.77 | -13.31 | -48.32 | -3.91 | 41.09 | 46.35 | 70.67  |
| [C4C1im][ClO4]    | -34.72 | 29.65 | -12.79 | -52.69 | -3.91 | 41.53 | 46.93 | 70.11  |
| [C5C1im][ClO4]    | -37.07 | 31.01 | -12.65 | -56.58 | -3.91 | 41.64 | 47.08 | 69.96  |
| [C6C1im][ClO4]    | -39.50 | 32.44 | -12.42 | -60.67 | -3.91 | 41.84 | 47.35 | 69.71  |
| [C7C1im][ClO4]    | -42.04 | 33.82 | -12.24 | -64.74 | -3.91 | 41.98 | 47.54 | 69.52  |
| [C8C1im][ClO4]    | -44.98 | 35.19 | -11.96 | -68.98 | -3.91 | 42.21 | 47.86 | 69.22  |
| [C9C1im][ClO4]    | -47.29 | 36.32 | -11.89 | -72.91 | -3.91 | 42.27 | 47.93 | 69.15  |
| [C10C1im][ClO4]   | -50.31 | 37.63 | -11.52 | -77.20 | -3.91 | 42.58 | 48.35 | 68.74  |
| [C1C1im][NO3]     | -28.67 | 37.13 | -26.37 | -39.42 | -3.91 | 30.20 | 31.71 | 84.77  |
| [C2C1im][NO3]     | -28.63 | 38.47 | -24.84 | -42.84 | -3.91 | 31.48 | 33.43 | 83.11  |
| [C3C1im][NO3]     | -31.16 | 38.91 | -24.36 | -46.49 | -3.91 | 31.88 | 33.96 | 82.60  |
| [C4C1im][NO3]     | -34.14 | 39.62 | -23.78 | -50.79 | -3.91 | 32.36 | 34.62 | 81.97  |
| [C5C1im][NO3]     | -37.20 | 40.08 | -23.64 | -54.61 | -3.91 | 32.48 | 34.77 | 81.82  |
| [C6C1im][NO3]     | -40.26 | 40.81 | -23.36 | -58.65 | -3.91 | 32.71 | 35.08 | 81.52  |
| [C7C1im][NO3]     | -43.39 | 41.59 | -23.25 | -62.67 | -3.91 | 32.81 | 35.22 | 81.39  |
| [C8C1im][NO3]     | -46.71 | 42.49 | -22.88 | -66.88 | -3.91 | 33.11 | 35.62 | 81.00  |
| [C9C1im][NO3]     | -49.30 | 43.18 | -22.84 | -70.77 | -3.91 | 33.15 | 35.67 | 80.95  |
| [C10C1im][NO3]    | -52.57 | 44.23 | -22.35 | -75.03 | -3.91 | 33.55 | 36.22 | 80.43  |
| [C1C1im][HSO4]    | -61.00 | 34.43 | -52.34 | -43.09 | -3.91 | 8.55  | 2.62  | 112.78 |
| [C2C1im][HSO4]    | -60.76 | 36.11 | -50.88 | -46.63 | -3.91 | 9.77  | 4.26  | 111.21 |
| [C3C1im][HSO4]    | -63.20 | 36.79 | -50.43 | -50.37 | -3.91 | 10.15 | 4.77  | 110.72 |
| [C4C1im][HSO4]    | -65.92 | 37.74 | -49.80 | -54.74 | -3.91 | 10.67 | 5.47  | 110.04 |
| [C5C1im][HSO4]    | -68.82 | 38.37 | -49.61 | -58.61 | -3.91 | 10.83 | 5.69  | 109.83 |
| [C6C1im][HSO4]    | -71.75 | 39.25 | -49.29 | -62.71 | -3.91 | 11.10 | 6.05  | 109.48 |

|                  |        |       |        |        |       |       |       |        |
|------------------|--------|-------|--------|--------|-------|-------|-------|--------|
| [C7C1im][HSO4]   | -74.72 | 40.15 | -49.09 | -66.77 | -3.91 | 11.26 | 6.26  | 109.28 |
| [C8C1im][HSO4]   | -77.95 | 41.16 | -48.69 | -71.03 | -3.91 | 11.59 | 6.71  | 108.85 |
| [C9C1im][HSO4]   | -80.45 | 41.94 | -48.60 | -74.95 | -3.91 | 11.67 | 6.82  | 108.74 |
| [C10C1im][HSO4]  | -83.65 | 43.06 | -48.09 | -79.24 | -3.91 | 12.10 | 7.39  | 108.19 |
| [C1C1im][MeSO4]  | -33.08 | 38.40 | -23.87 | -47.61 | -3.91 | 32.29 | 34.52 | 82.07  |
| [C2C1im][MeSO4]  | -32.50 | 40.43 | -22.38 | -51.19 | -3.91 | 33.53 | 36.18 | 80.46  |
| [C3C1im][MeSO4]  | -34.88 | 41.27 | -22.00 | -54.96 | -3.91 | 33.85 | 36.61 | 80.05  |
| [C4C1im][MeSO4]  | -37.65 | 42.27 | -21.45 | -59.33 | -3.91 | 34.30 | 37.23 | 79.46  |
| [C5C1im][MeSO4]  | -40.69 | 42.87 | -21.34 | -63.22 | -3.91 | 34.39 | 37.35 | 79.34  |
| [C6C1im][MeSO4]  | -43.74 | 43.69 | -21.10 | -67.31 | -3.91 | 34.60 | 37.62 | 79.07  |
| [C7C1im][MeSO4]  | -46.85 | 44.54 | -20.98 | -71.37 | -3.91 | 34.70 | 37.76 | 78.94  |
| [C8C1im][MeSO4]  | -50.18 | 45.47 | -20.64 | -75.61 | -3.91 | 34.98 | 38.13 | 78.58  |
| [C9C1im][MeSO4]  | -52.81 | 46.19 | -20.61 | -79.53 | -3.91 | 35.00 | 38.17 | 78.55  |
| [C10C1im][MeSO4] | -56.09 | 47.26 | -20.14 | -83.82 | -3.91 | 35.40 | 38.69 | 78.04  |
| [C1C1im][EtSO4]  | -35.70 | 39.45 | -24.01 | -51.75 | -3.91 | 32.17 | 34.36 | 82.22  |
| [C2C1im][EtSO4]  | -35.02 | 41.63 | -22.55 | -55.36 | -3.91 | 33.39 | 36.00 | 80.64  |
| [C3C1im][EtSO4]  | -37.34 | 42.59 | -22.19 | -59.15 | -3.91 | 33.69 | 36.40 | 80.26  |
| [C4C1im][EtSO4]  | -40.07 | 43.66 | -21.67 | -63.53 | -3.91 | 34.12 | 36.98 | 79.69  |
| [C5C1im][EtSO4]  | -43.12 | 44.30 | -21.58 | -67.43 | -3.91 | 34.20 | 37.08 | 79.60  |
| [C6C1im][EtSO4]  | -46.20 | 45.11 | -21.35 | -71.52 | -3.91 | 34.39 | 37.34 | 79.35  |
| [C7C1im][EtSO4]  | -49.35 | 45.93 | -21.24 | -75.59 | -3.91 | 34.48 | 37.46 | 79.23  |
| [C8C1im][EtSO4]  | -52.72 | 46.83 | -20.92 | -79.83 | -3.91 | 34.75 | 37.82 | 78.88  |
| [C9C1im][EtSO4]  | -55.41 | 47.52 | -20.89 | -83.76 | -3.91 | 34.77 | 37.85 | 78.85  |
| [C10C1im][EtSO4] | -58.73 | 48.55 | -20.43 | -88.05 | -3.91 | 35.16 | 38.37 | 78.35  |
| [C1C1im][BuSO4]  | -42.06 | 40.59 | -23.39 | -59.67 | -3.91 | 32.69 | 35.06 | 81.54  |
| [C2C1im][BuSO4]  | -41.42 | 42.81 | -21.99 | -63.33 | -3.91 | 33.86 | 36.62 | 80.04  |
| [C3C1im][BuSO4]  | -43.72 | 43.89 | -21.69 | -67.14 | -3.91 | 34.11 | 36.96 | 79.71  |
| [C4C1im][BuSO4]  | -46.40 | 45.05 | -21.20 | -71.54 | -3.91 | 34.51 | 37.51 | 79.19  |

|                     |        |       |        |         |       |       |       |       |
|---------------------|--------|-------|--------|---------|-------|-------|-------|-------|
| [C5C1im][BuSO4]     | -49.47 | 45.74 | -21.14 | -75.45  | -3.91 | 34.56 | 37.57 | 79.12 |
| [C6C1im][BuSO4]     | -52.56 | 46.56 | -20.93 | -79.56  | -3.91 | 34.74 | 37.81 | 78.90 |
| [C7C1im][BuSO4]     | -55.77 | 47.37 | -20.85 | -83.64  | -3.91 | 34.81 | 37.90 | 78.80 |
| [C8C1im][BuSO4]     | -59.17 | 48.25 | -20.54 | -87.88  | -3.91 | 35.06 | 38.24 | 78.48 |
| [C9C1im][BuSO4]     | -61.93 | 48.91 | -20.53 | -91.83  | -3.91 | 35.07 | 38.26 | 78.46 |
| [C10C1im][BuSO4]    | -65.29 | 49.90 | -20.09 | -96.11  | -3.91 | 35.44 | 38.75 | 77.99 |
| [C1C1im][OcSO4]     | -53.25 | 44.21 | -22.41 | -76.02  | -3.91 | 33.50 | 36.15 | 80.49 |
| [C2C1im][OcSO4]     | -52.97 | 46.15 | -21.09 | -79.71  | -3.91 | 34.60 | 37.63 | 79.07 |
| [C3C1im][OcSO4]     | -55.47 | 47.16 | -20.85 | -83.55  | -3.91 | 34.80 | 37.89 | 78.81 |
| [C4C1im][OcSO4]     | -58.22 | 48.26 | -20.41 | -87.96  | -3.91 | 35.17 | 38.39 | 78.34 |
| [C5C1im][OcSO4]     | -61.41 | 48.92 | -20.40 | -91.90  | -3.91 | 35.18 | 38.41 | 78.32 |
| [C6C1im][OcSO4]     | -64.60 | 49.68 | -20.22 | -96.01  | -3.91 | 35.33 | 38.60 | 78.13 |
| [C7C1im][OcSO4]     | -67.92 | 50.43 | -20.17 | -100.11 | -3.91 | 35.38 | 38.67 | 78.07 |
| [C8C1im][OcSO4]     | -71.42 | 51.23 | -19.90 | -104.36 | -3.91 | 35.60 | 38.97 | 77.78 |
| [C9C1im][OcSO4]     | -74.29 | 51.83 | -19.90 | -108.31 | -3.91 | 35.60 | 38.97 | 77.78 |
| [C10C1im][OcSO4]    | -79.44 | 52.09 | -19.93 | -113.15 | -3.91 | 35.57 | 38.93 | 77.82 |
| [C1C1im][MeOEtSO4]  | -34.97 | 43.15 | -23.66 | -57.22  | -3.91 | 32.46 | 34.75 | 81.84 |
| [C2C1im][MeOEtSO4]  | -34.21 | 45.39 | -22.18 | -60.85  | -3.91 | 33.69 | 36.40 | 80.25 |
| [C3C1im][MeOEtSO4]  | -36.55 | 46.38 | -21.85 | -64.64  | -3.91 | 33.97 | 36.78 | 79.89 |
| [C4C1im][MeOEtSO4]  | -39.31 | 47.44 | -21.33 | -69.03  | -3.91 | 34.40 | 37.36 | 79.33 |
| [C5C1im][MeOEtSO4]  | -42.40 | 48.07 | -21.26 | -72.94  | -3.91 | 34.46 | 37.44 | 79.25 |
| [C6C1im][MeOEtSO4]  | -45.52 | 48.87 | -21.05 | -77.04  | -3.91 | 34.64 | 37.68 | 79.02 |
| [C7C1im][MeOEtSO4]  | -48.68 | 49.70 | -20.95 | -81.11  | -3.91 | 34.73 | 37.79 | 78.91 |
| [C8C1im][MeOEtSO4]  | -52.06 | 50.59 | -20.63 | -85.36  | -3.91 | 34.99 | 38.14 | 78.57 |
| [C9C1im][MeOEtSO4]  | -54.76 | 51.29 | -20.62 | -89.29  | -3.91 | 35.00 | 38.16 | 78.56 |
| [C10C1im][MeOEtSO4] | -58.08 | 52.32 | -20.16 | -93.57  | -3.91 | 35.38 | 38.67 | 78.07 |
| [C1C1im][EtOEtSO4]  | -38.36 | 43.51 | -23.42 | -61.45  | -3.91 | 32.66 | 35.02 | 81.58 |
| [C2C1im][EtOEtSO4]  | -37.60 | 45.75 | -21.96 | -65.09  | -3.91 | 33.88 | 36.65 | 80.01 |

|                        |        |       |        |         |       |       |       |       |
|------------------------|--------|-------|--------|---------|-------|-------|-------|-------|
| [C3C1im][EtOEtSO4]     | -39.88 | 46.83 | -21.64 | -68.90  | -3.91 | 34.14 | 37.01 | 79.66 |
| [C4C1im][EtOEtSO4]     | -42.58 | 47.94 | -21.15 | -73.29  | -3.91 | 34.56 | 37.57 | 79.13 |
| [C5C1im][EtOEtSO4]     | -45.65 | 48.62 | -21.08 | -77.21  | -3.91 | 34.61 | 37.64 | 79.06 |
| [C6C1im][EtOEtSO4]     | -48.76 | 49.43 | -20.88 | -81.31  | -3.91 | 34.78 | 37.87 | 78.84 |
| [C7C1im][EtOEtSO4]     | -51.93 | 50.25 | -20.78 | -85.39  | -3.91 | 34.86 | 37.97 | 78.74 |
| [C8C1im][EtOEtSO4]     | -55.33 | 51.13 | -20.48 | -89.63  | -3.91 | 35.11 | 38.31 | 78.41 |
| [C9C1im][EtOEtSO4]     | -58.05 | 51.81 | -20.47 | -93.57  | -3.91 | 35.12 | 38.32 | 78.40 |
| [C10C1im][EtOEtSO4]    | -61.39 | 52.80 | -20.02 | -97.85  | -3.91 | 35.50 | 38.83 | 77.91 |
| [C1C1im][MeOEtOEtSO4]  | -39.27 | 49.77 | -23.86 | -67.30  | -3.91 | 32.29 | 34.52 | 82.06 |
| [C2C1im][MeOEtOEtSO4]  | -38.46 | 52.02 | -22.37 | -70.94  | -3.91 | 33.54 | 36.19 | 80.45 |
| [C3C1im][MeOEtOEtSO4]  | -40.81 | 53.03 | -22.06 | -74.76  | -3.91 | 33.80 | 36.55 | 80.11 |
| [C4C1im][MeOEtOEtSO4]  | -43.62 | 54.04 | -21.57 | -79.15  | -3.91 | 34.21 | 37.10 | 79.58 |
| [C5C1im][MeOEtOEtSO4]  | -46.78 | 54.65 | -21.52 | -83.07  | -3.91 | 34.25 | 37.15 | 79.53 |
| [C6C1im][MeOEtOEtSO4]  | -49.96 | 55.41 | -21.33 | -87.18  | -3.91 | 34.40 | 37.36 | 79.33 |
| [C7C1im][MeOEtOEtSO4]  | -53.19 | 56.19 | -21.25 | -91.26  | -3.91 | 34.47 | 37.45 | 79.24 |
| [C8C1im][MeOEtOEtSO4]  | -56.63 | 57.02 | -20.95 | -95.50  | -3.91 | 34.72 | 37.78 | 78.92 |
| [C9C1im][MeOEtOEtSO4]  | -59.41 | 57.66 | -20.96 | -99.44  | -3.91 | 34.72 | 37.78 | 78.92 |
| [C10C1im][MeOEtOEtSO4] | -62.75 | 58.65 | -20.51 | -103.73 | -3.91 | 35.09 | 38.28 | 78.44 |
| [C1C1im][SCN]          | -34.66 | 31.54 | -17.97 | -48.23  | -3.91 | 37.21 | 41.13 | 75.70 |
| [C2C1im][SCN]          | -34.13 | 33.78 | -17.17 | -51.50  | -3.91 | 37.87 | 42.02 | 74.84 |
| [C3C1im][SCN]          | -36.38 | 34.83 | -17.04 | -55.01  | -3.91 | 37.98 | 42.17 | 74.70 |
| [C4C1im][SCN]          | -38.89 | 36.10 | -16.64 | -59.36  | -3.91 | 38.31 | 42.61 | 74.27 |
| [C5C1im][SCN]          | -41.76 | 36.96 | -16.62 | -63.19  | -3.91 | 38.33 | 42.64 | 74.24 |
| [C6C1im][SCN]          | -44.54 | 38.03 | -16.44 | -67.20  | -3.91 | 38.48 | 42.84 | 74.05 |
| [C7C1im][SCN]          | -47.48 | 39.08 | -16.42 | -71.20  | -3.91 | 38.50 | 42.86 | 74.03 |
| [C8C1im][SCN]          | -50.73 | 40.18 | -16.20 | -75.41  | -3.91 | 38.68 | 43.11 | 73.79 |
| [C9C1im][SCN]          | -53.18 | 41.09 | -16.18 | -79.26  | -3.91 | 38.70 | 43.14 | 73.76 |
| [C10C1im][SCN]         | -56.44 | 42.23 | -15.86 | -83.52  | -3.91 | 38.96 | 43.49 | 73.42 |

|                   |        |       |        |        |       |       |       |       |
|-------------------|--------|-------|--------|--------|-------|-------|-------|-------|
| [C1C1im][N(CN)2]  | -38.28 | 32.02 | -24.04 | -46.27 | -3.91 | 32.14 | 34.32 | 82.25 |
| [C2C1im][N(CN)2]  | -36.80 | 34.54 | -22.88 | -49.18 | -3.91 | 33.11 | 35.62 | 81.00 |
| [C3C1im][N(CN)2]  | -38.53 | 35.74 | -22.65 | -52.44 | -3.91 | 33.30 | 35.88 | 80.75 |
| [C4C1im][N(CN)2]  | -40.89 | 36.99 | -22.12 | -56.72 | -3.91 | 33.74 | 36.47 | 80.18 |
| [C5C1im][N(CN)2]  | -43.69 | 37.81 | -22.07 | -60.49 | -3.91 | 33.79 | 36.54 | 80.12 |
| [C6C1im][N(CN)2]  | -46.39 | 38.80 | -21.81 | -64.41 | -3.91 | 34.00 | 36.82 | 79.85 |
| [C7C1im][N(CN)2]  | -49.32 | 39.73 | -21.74 | -68.34 | -3.91 | 34.06 | 36.90 | 79.77 |
| [C8C1im][N(CN)2]  | -52.54 | 40.72 | -21.42 | -72.50 | -3.91 | 34.33 | 37.26 | 79.42 |
| [C9C1im][N(CN)2]  | -54.96 | 41.53 | -21.37 | -76.26 | -3.91 | 34.37 | 37.32 | 79.37 |
| [C10C1im][N(CN)2] | -58.19 | 42.56 | -20.93 | -80.49 | -3.91 | 34.74 | 37.81 | 78.89 |
| [C1C1im][C(CN)3]  | -43.25 | 28.82 | -18.10 | -53.97 | -3.91 | 37.10 | 40.98 | 75.84 |
| [C2C1im][C(CN)3]  | -41.06 | 31.67 | -16.99 | -56.62 | -3.91 | 38.02 | 42.22 | 74.64 |
| [C3C1im][C(CN)3]  | -42.25 | 33.36 | -16.82 | -59.66 | -3.91 | 38.17 | 42.41 | 74.46 |
| [C4C1im][C(CN)3]  | -44.03 | 34.93 | -16.30 | -63.80 | -3.91 | 38.60 | 43.00 | 73.90 |
| [C5C1im][C(CN)3]  | -46.51 | 36.03 | -16.23 | -67.47 | -3.91 | 38.65 | 43.07 | 73.83 |
| [C6C1im][C(CN)3]  | -48.95 | 37.19 | -15.99 | -71.29 | -3.91 | 38.86 | 43.34 | 73.56 |
| [C7C1im][C(CN)3]  | -51.63 | 38.26 | -15.87 | -75.14 | -3.91 | 38.96 | 43.48 | 73.43 |
| [C8C1im][C(CN)3]  | -54.69 | 39.34 | -15.58 | -79.22 | -3.91 | 39.20 | 43.80 | 73.12 |
| [C9C1im][C(CN)3]  | -57.02 | 40.24 | -15.51 | -82.93 | -3.91 | 39.25 | 43.88 | 73.05 |
| [C10C1im][C(CN)3] | -60.13 | 41.28 | -15.11 | -87.08 | -3.91 | 39.59 | 44.32 | 72.62 |
| [C1C1im][B(CN)4]  | -47.75 | 28.57 | -13.76 | -62.56 | -3.91 | 40.71 | 45.84 | 71.16 |
| [C2C1im][B(CN)4]  | -45.36 | 31.26 | -12.76 | -64.84 | -3.91 | 41.55 | 46.96 | 70.08 |
| [C3C1im][B(CN)4]  | -46.18 | 33.09 | -12.60 | -67.58 | -3.91 | 41.68 | 47.14 | 69.91 |
| [C4C1im][B(CN)4]  | -47.61 | 34.74 | -12.13 | -71.48 | -3.91 | 42.08 | 47.67 | 69.40 |
| [C5C1im][B(CN)4]  | -49.86 | 35.95 | -12.04 | -75.00 | -3.91 | 42.14 | 47.76 | 69.31 |
| [C6C1im][B(CN)4]  | -52.10 | 37.16 | -11.82 | -78.66 | -3.91 | 42.33 | 48.01 | 69.07 |
| [C7C1im][B(CN)4]  | -54.58 | 38.29 | -11.68 | -82.38 | -3.91 | 42.45 | 48.17 | 68.92 |
| [C8C1im][B(CN)4]  | -57.50 | 39.40 | -11.43 | -86.32 | -3.91 | 42.66 | 48.45 | 68.65 |

|                   |        |       |        |        |       |       |       |       |
|-------------------|--------|-------|--------|--------|-------|-------|-------|-------|
| [C9C1im][B(CN)4]  | -59.76 | 40.34 | -11.36 | -89.94 | -3.91 | 42.71 | 48.53 | 68.57 |
| [C10C1im][B(CN)4] | -62.78 | 41.35 | -11.02 | -93.97 | -3.91 | 43.00 | 48.91 | 68.20 |
| [C1C1im][BCIF3]   | -31.90 | 20.87 | -8.44  | -44.33 | -3.91 | 45.15 | 51.80 | 65.42 |
| [C2C1im][BCIF3]   | -29.99 | 24.49 | -7.65  | -47.81 | -3.91 | 45.81 | 52.69 | 64.56 |
| [C3C1im][BCIF3]   | -31.21 | 26.80 | -7.46  | -51.48 | -3.91 | 45.97 | 52.90 | 64.36 |
| [C4C1im][BCIF3]   | -32.62 | 29.04 | -7.11  | -55.80 | -3.91 | 46.26 | 53.29 | 63.98 |
| [C5C1im][BCIF3]   | -34.75 | 30.70 | -7.01  | -59.66 | -3.91 | 46.34 | 53.40 | 63.88 |
| [C6C1im][BCIF3]   | -37.01 | 32.34 | -6.85  | -63.71 | -3.91 | 46.47 | 53.58 | 63.71 |
| [C7C1im][BCIF3]   | -39.41 | 33.88 | -6.72  | -67.76 | -3.91 | 46.58 | 53.73 | 63.56 |
| [C8C1im][BCIF3]   | -42.29 | 35.36 | -6.54  | -71.97 | -3.91 | 46.73 | 53.93 | 63.37 |
| [C9C1im][BCIF3]   | -44.54 | 36.61 | -6.49  | -75.89 | -3.91 | 46.78 | 53.99 | 63.31 |
| [C10C1im][BCIF3]  | -47.57 | 37.96 | -6.25  | -80.14 | -3.91 | 46.97 | 54.25 | 63.06 |
| [C1C1im][BF4]     | -22.72 | 25.74 | -11.20 | -37.26 | -3.91 | 42.85 | 48.71 | 68.40 |
| [C2C1im][BF4]     | -21.48 | 28.62 | -10.22 | -40.74 | -3.91 | 43.67 | 49.81 | 67.34 |
| [C3C1im][BF4]     | -23.26 | 30.24 | -9.97  | -44.41 | -3.91 | 43.88 | 50.09 | 67.07 |
| [C4C1im][BF4]     | -25.17 | 31.99 | -9.54  | -48.75 | -3.91 | 44.23 | 50.56 | 66.61 |
| [C5C1im][BF4]     | -27.61 | 33.26 | -9.42  | -52.61 | -3.91 | 44.33 | 50.70 | 66.48 |
| [C6C1im][BF4]     | -30.11 | 34.64 | -9.22  | -56.67 | -3.91 | 44.50 | 50.92 | 66.27 |
| [C7C1im][BF4]     | -32.67 | 35.99 | -9.07  | -60.72 | -3.91 | 44.62 | 51.09 | 66.10 |
| [C8C1im][BF4]     | -35.66 | 37.35 | -8.85  | -64.94 | -3.91 | 44.81 | 51.34 | 65.86 |
| [C9C1im][BF4]     | -37.98 | 38.46 | -8.79  | -68.86 | -3.91 | 44.86 | 51.41 | 65.80 |
| [C10C1im][BF4]    | -41.04 | 39.78 | -8.50  | -73.12 | -3.91 | 45.10 | 51.74 | 65.48 |
| [C1C1im][BCl4]    | -46.82 | 21.36 | -4.81  | -63.37 | -3.91 | 48.18 | 55.87 | 61.50 |
| [C2C1im][BCl4]    | -46.12 | 23.92 | -4.32  | -66.86 | -3.91 | 48.58 | 56.41 | 60.98 |
| [C3C1im][BCl4]    | -47.46 | 26.31 | -4.22  | -70.52 | -3.91 | 48.67 | 56.53 | 60.87 |
| [C4C1im][BCl4]    | -48.87 | 28.50 | -4.00  | -74.79 | -3.91 | 48.85 | 56.77 | 60.63 |
| [C5C1im][BCl4]    | -51.01 | 30.28 | -3.94  | -78.65 | -3.91 | 48.90 | 56.84 | 60.56 |
| [C6C1im][BCl4]    | -53.33 | 31.89 | -3.84  | -82.68 | -3.91 | 48.99 | 56.95 | 60.45 |

|                 |        |       |       |        |       |       |       |       |
|-----------------|--------|-------|-------|--------|-------|-------|-------|-------|
| [C7C1im][BCl4]  | -55.83 | 33.37 | -3.75 | -86.71 | -3.91 | 49.06 | 57.05 | 60.36 |
| [C8C1im][BCl4]  | -58.81 | 34.76 | -3.64 | -90.90 | -3.91 | 49.15 | 57.18 | 60.24 |
| [C9C1im][BCl4]  | -61.21 | 35.97 | -3.60 | -94.81 | -3.91 | 49.18 | 57.22 | 60.20 |
| [C10C1im][BCl4] | -64.40 | 37.13 | -3.46 | -99.03 | -3.91 | 49.30 | 57.38 | 60.04 |
| [C1C1im][PF6]   | -22.83 | 19.05 | -3.40 | -38.49 | -3.91 | 49.35 | 57.45 | 59.98 |
| [C2C1im][PF6]   | -21.02 | 22.85 | -3.04 | -41.94 | -3.91 | 49.65 | 57.85 | 59.59 |
| [C3C1im][PF6]   | -22.00 | 25.58 | -2.95 | -45.59 | -3.91 | 49.72 | 57.95 | 59.50 |
| [C4C1im][PF6]   | -23.22 | 28.07 | -2.79 | -49.88 | -3.91 | 49.86 | 58.13 | 59.33 |
| [C5C1im][PF6]   | -25.22 | 29.97 | -2.74 | -53.74 | -3.91 | 49.90 | 58.18 | 59.27 |
| [C6C1im][PF6]   | -27.40 | 31.75 | -2.67 | -57.78 | -3.91 | 49.96 | 58.27 | 59.19 |
| [C7C1im][PF6]   | -29.77 | 33.38 | -2.60 | -61.81 | -3.91 | 50.02 | 58.34 | 59.12 |
| [C8C1im][PF6]   | -32.65 | 34.93 | -2.52 | -66.01 | -3.91 | 50.08 | 58.43 | 59.04 |
| [C9C1im][PF6]   | -34.92 | 36.25 | -2.49 | -69.92 | -3.91 | 50.11 | 58.46 | 59.01 |
| [C10C1im][PF6]  | -38.01 | 37.58 | -2.39 | -74.15 | -3.91 | 50.19 | 58.57 | 58.89 |
| [C1C1im][AsF6]  | -22.19 | 19.01 | -2.05 | -39.15 | -3.91 | 50.48 | 58.96 | 58.52 |
| [C2C1im][AsF6]  | -20.67 | 22.59 | -1.82 | -42.59 | -3.91 | 50.66 | 59.21 | 58.28 |
| [C3C1im][AsF6]  | -21.65 | 25.37 | -1.77 | -46.23 | -3.91 | 50.71 | 59.27 | 58.23 |
| [C4C1im][AsF6]  | -22.87 | 27.87 | -1.67 | -50.50 | -3.91 | 50.79 | 59.38 | 58.12 |
| [C5C1im][AsF6]  | -24.86 | 29.82 | -1.64 | -54.36 | -3.91 | 50.82 | 59.42 | 58.08 |
| [C6C1im][AsF6]  | -27.05 | 31.60 | -1.59 | -58.38 | -3.91 | 50.86 | 59.47 | 58.03 |
| [C7C1im][AsF6]  | -29.44 | 33.24 | -1.55 | -62.41 | -3.91 | 50.89 | 59.52 | 57.99 |
| [C8C1im][AsF6]  | -32.34 | 34.77 | -1.50 | -66.59 | -3.91 | 50.93 | 59.57 | 57.93 |
| [C9C1im][AsF6]  | -34.64 | 36.10 | -1.48 | -70.51 | -3.91 | 50.95 | 59.59 | 57.91 |
| [C10C1im][AsF6] | -37.78 | 37.39 | -1.42 | -74.73 | -3.91 | 51.00 | 59.66 | 57.85 |
| [C1C1im][SbF6]  | -22.06 | 20.20 | -1.94 | -40.32 | -3.91 | 50.57 | 59.08 | 58.41 |
| [C2C1im][SbF6]  | -21.12 | 23.14 | -1.73 | -43.71 | -3.91 | 50.74 | 59.31 | 58.18 |
| [C3C1im][SbF6]  | -22.29 | 25.75 | -1.69 | -47.32 | -3.91 | 50.78 | 59.36 | 58.14 |
| [C4C1im][SbF6]  | -23.62 | 28.08 | -1.59 | -51.57 | -3.91 | 50.86 | 59.47 | 58.03 |

|                 |        |       |        |        |       |       |       |       |
|-----------------|--------|-------|--------|--------|-------|-------|-------|-------|
| [C5C1im][SbF6]  | -25.69 | 29.96 | -1.56  | -55.41 | -3.91 | 50.88 | 59.50 | 58.00 |
| [C6C1im][SbF6]  | -27.96 | 31.65 | -1.52  | -59.42 | -3.91 | 50.92 | 59.55 | 57.96 |
| [C7C1im][SbF6]  | -30.42 | 33.20 | -1.48  | -63.43 | -3.91 | 50.95 | 59.59 | 57.91 |
| [C8C1im][SbF6]  | -33.39 | 34.65 | -1.44  | -67.60 | -3.91 | 50.99 | 59.65 | 57.86 |
| [C9C1im][SbF6]  | -35.76 | 35.91 | -1.42  | -71.50 | -3.91 | 51.00 | 59.66 | 57.85 |
| [C10C1im][SbF6] | -38.96 | 37.12 | -1.36  | -75.70 | -3.91 | 51.05 | 59.73 | 57.78 |
| [C1C1im][BETI]  | -26.53 | 22.07 | -7.25  | -41.35 | -3.91 | 46.14 | 53.13 | 64.14 |
| [C2C1im][BETI]  | -25.77 | 24.80 | -7.03  | -44.63 | -3.91 | 46.33 | 53.38 | 63.90 |
| [C3C1im][BETI]  | -27.19 | 27.12 | -7.12  | -48.14 | -3.91 | 46.25 | 53.28 | 63.99 |
| [C4C1im][BETI]  | -28.71 | 29.25 | -6.96  | -52.37 | -3.91 | 46.39 | 53.46 | 63.82 |
| [C5C1im][BETI]  | -30.99 | 30.92 | -7.01  | -56.17 | -3.91 | 46.34 | 53.40 | 63.88 |
| [C6C1im][BETI]  | -33.36 | 32.46 | -6.95  | -60.14 | -3.91 | 46.39 | 53.47 | 63.81 |
| [C7C1im][BETI]  | -36.00 | 33.85 | -6.97  | -64.12 | -3.91 | 46.37 | 53.44 | 63.84 |
| [C8C1im][BETI]  | -39.09 | 35.18 | -6.91  | -68.28 | -3.91 | 46.43 | 53.51 | 63.77 |
| [C9C1im][BETI]  | -41.51 | 36.33 | -6.91  | -72.15 | -3.91 | 46.43 | 53.51 | 63.77 |
| [C10C1im][BETI] | -44.76 | 37.45 | -6.78  | -76.35 | -3.91 | 46.54 | 53.66 | 63.62 |
| [C1C1im][Tf2N]  | -34.40 | 29.27 | -10.61 | -54.32 | -3.91 | 43.34 | 49.37 | 67.76 |
| [C2C1im][Tf2N]  | -34.08 | 30.92 | -9.77  | -57.54 | -3.91 | 44.04 | 50.31 | 66.86 |
| [C3C1im][Tf2N]  | -36.09 | 32.32 | -9.64  | -60.99 | -3.91 | 44.15 | 50.45 | 66.72 |
| [C4C1im][Tf2N]  | -37.99 | 33.77 | -9.28  | -65.08 | -3.91 | 44.45 | 50.86 | 66.33 |
| [C5C1im][Tf2N]  | -40.56 | 34.91 | -9.22  | -68.78 | -3.91 | 44.50 | 50.92 | 66.27 |
| [C6C1im][Tf2N]  | -43.16 | 36.02 | -9.07  | -72.65 | -3.91 | 44.63 | 51.10 | 66.10 |
| [C7C1im][Tf2N]  | -45.94 | 37.06 | -8.96  | -76.54 | -3.91 | 44.72 | 51.22 | 65.98 |
| [C8C1im][Tf2N]  | -49.07 | 38.08 | -8.77  | -80.60 | -3.91 | 44.88 | 51.43 | 65.77 |
| [C9C1im][Tf2N]  | -51.63 | 38.95 | -8.73  | -84.40 | -3.91 | 44.91 | 51.48 | 65.73 |
| [C10C1im][Tf2N] | -54.86 | 39.89 | -8.45  | -88.51 | -3.91 | 45.14 | 51.79 | 65.43 |
| [C1C1im][Pf2N]  | -34.96 | 32.97 | -9.32  | -60.18 | -3.91 | 44.41 | 50.81 | 66.37 |
| [C2C1im][Pf2N]  | -35.26 | 34.03 | -8.60  | -63.30 | -3.91 | 45.02 | 51.62 | 65.59 |



|                 |        |       |        |        |       |       |       |       |
|-----------------|--------|-------|--------|--------|-------|-------|-------|-------|
| [C3C1im][Pf2N]  | -37.61 | 35.08 | -8.50  | -66.66 | -3.91 | 45.10 | 51.73 | 65.49 |
| [C4C1im][Pf2N]  | -39.73 | 36.23 | -8.18  | -70.64 | -3.91 | 45.36 | 52.09 | 65.14 |
| [C5C1im][Pf2N]  | -42.47 | 37.18 | -8.15  | -74.27 | -3.91 | 45.39 | 52.13 | 65.10 |
| [C6C1im][Pf2N]  | -45.19 | 38.10 | -8.01  | -78.05 | -3.91 | 45.51 | 52.28 | 64.96 |
| [C7C1im][Pf2N]  | -48.08 | 38.97 | -7.92  | -81.87 | -3.91 | 45.58 | 52.38 | 64.86 |
| [C8C1im][Pf2N]  | -51.31 | 39.84 | -7.76  | -85.84 | -3.91 | 45.72 | 52.56 | 64.69 |
| [C9C1im][Pf2N]  | -53.97 | 40.59 | -7.72  | -89.58 | -3.91 | 45.75 | 52.60 | 64.65 |
| [C10C1im][Pf2N] | -57.29 | 41.38 | -7.48  | -93.62 | -3.91 | 45.95 | 52.87 | 64.39 |
| [C1C1im][Impf]  | -37.49 | 25.45 | -15.17 | -48.42 | -3.91 | 39.54 | 44.26 | 72.68 |
| [C2C1im][Impf]  | -36.74 | 27.63 | -14.26 | -51.69 | -3.91 | 40.30 | 45.29 | 71.69 |
| [C3C1im][Impf]  | -38.48 | 29.30 | -14.14 | -55.19 | -3.91 | 40.40 | 45.42 | 71.56 |
| [C4C1im][Impf]  | -40.32 | 30.96 | -13.74 | -59.37 | -3.91 | 40.73 | 45.86 | 71.14 |
| [C5C1im][Impf]  | -42.85 | 32.19 | -13.72 | -63.13 | -3.91 | 40.75 | 45.88 | 71.12 |
| [C6C1im][Impf]  | -45.41 | 33.40 | -13.54 | -67.07 | -3.91 | 40.89 | 46.08 | 70.93 |
| [C7C1im][Impf]  | -48.21 | 34.50 | -13.47 | -71.03 | -3.91 | 40.96 | 46.16 | 70.85 |
| [C8C1im][Impf]  | -51.34 | 35.60 | -13.25 | -75.15 | -3.91 | 41.14 | 46.41 | 70.61 |
| [C9C1im][Impf]  | -53.84 | 36.52 | -13.21 | -78.99 | -3.91 | 41.17 | 46.46 | 70.56 |
| [C10C1im][Impf] | -57.07 | 37.52 | -12.89 | -83.16 | -3.91 | 41.44 | 46.82 | 70.22 |
| [C1C1im][Tf2C]  | -37.12 | 29.76 | -12.47 | -55.40 | -3.91 | 41.79 | 47.29 | 69.76 |
| [C2C1im][Tf2C]  | -36.98 | 31.38 | -11.57 | -58.73 | -3.91 | 42.54 | 48.29 | 68.80 |
| [C3C1im][Tf2C]  | -39.11 | 32.76 | -11.42 | -62.28 | -3.91 | 42.66 | 48.46 | 68.64 |
| [C4C1im][Tf2C]  | -41.08 | 34.21 | -11.03 | -66.43 | -3.91 | 42.99 | 48.90 | 68.21 |
| [C5C1im][Tf2C]  | -43.70 | 35.33 | -10.97 | -70.17 | -3.91 | 43.04 | 48.97 | 68.15 |
| [C6C1im][Tf2C]  | -46.35 | 36.43 | -10.79 | -74.09 | -3.91 | 43.19 | 49.16 | 67.96 |
| [C7C1im][Tf2C]  | -49.17 | 37.47 | -10.68 | -78.03 | -3.91 | 43.29 | 49.30 | 67.83 |
| [C8C1im][Tf2C]  | -52.33 | 38.50 | -10.46 | -82.11 | -3.91 | 43.46 | 49.53 | 67.60 |
| [C9C1im][Tf2C]  | -54.91 | 39.37 | -10.41 | -85.95 | -3.91 | 43.51 | 49.59 | 67.55 |
| [C10C1im][Tf2C] | -58.16 | 40.31 | -10.11 | -90.09 | -3.91 | 43.76 | 49.93 | 67.22 |

|                 |        |       |       |        |       |       |       |       |
|-----------------|--------|-------|-------|--------|-------|-------|-------|-------|
| [C1C1im][Tf3C]  | -37.22 | 31.84 | -8.01 | -61.37 | -3.91 | 45.51 | 52.28 | 64.96 |
| [C2C1im][Tf3C]  | -37.67 | 32.88 | -7.34 | -64.60 | -3.91 | 46.07 | 53.03 | 64.24 |
| [C3C1im][Tf3C]  | -40.08 | 33.99 | -7.24 | -68.07 | -3.91 | 46.15 | 53.14 | 64.13 |
| [C4C1im][Tf3C]  | -42.19 | 35.20 | -6.95 | -72.10 | -3.91 | 46.39 | 53.46 | 63.82 |
| [C5C1im][Tf3C]  | -44.90 | 36.23 | -6.91 | -75.76 | -3.91 | 46.42 | 53.51 | 63.77 |
| [C6C1im][Tf3C]  | -47.63 | 37.21 | -6.79 | -79.60 | -3.91 | 46.53 | 53.65 | 63.64 |
| [C7C1im][Tf3C]  | -50.51 | 38.13 | -6.70 | -83.45 | -3.91 | 46.60 | 53.75 | 63.54 |
| [C8C1im][Tf3C]  | -53.73 | 39.05 | -6.55 | -87.46 | -3.91 | 46.72 | 53.91 | 63.38 |
| [C9C1im][Tf3C]  | -56.40 | 39.85 | -6.52 | -91.23 | -3.91 | 46.75 | 53.95 | 63.35 |
| [C10C1im][Tf3C] | -59.73 | 40.66 | -6.30 | -95.30 | -3.91 | 46.93 | 54.19 | 63.11 |

---

The average absolute relative deviation, AARD, was calculated using Equation S31,

$$AARD/\% = \frac{1}{N} \sum \frac{|CA_{EXP} - CA_{PRED}|}{CA_{EXP}} \times 100\% \quad (S31)$$

where,  $N$  is the number of experimental points,  $CA_{EXP}$  is the experimental contact angle and  $CA_{PRED}$  is the respective predicted value using COSMO-RS.
